# Supplementary material for: The Urinary Metabolomic Fingerprint in Extremely Preterm Infants on Total Parenteral Nutrition vs Enteral Feeds
Source: Preprints.org preprint supplement (doi:10.20944/preprints202307.2091.v1), 2023-07-31
Supplement: Supplementary file 3 [file Table_S4_title_full labels_R1.xlsx]

## Sheet: Sheet1
Table S4: Time Course Summary Statistics: TOLSURF Infants with Longitudinal Metabolomic Profiling.
Paired t-test of on/off TPN for two time points: 1) completely on TPN (no additional nutrition) and 2) completely weaned off TPN (breast milk only), n=23 infants
Chemical Name	Sub-Pathway	Super-Pathway	Metabolon Chemical ID	Fold change (mean)	p value	q value
mannonate*	Food Component/Plant	Xenobiotics	100003695	0.286062	2.26207e-08	2.69413e-05
gluconate	Food Component/Plant	Xenobiotics	338	0.305207	3.57838e-08	2.13092e-05
X-17367			999917367	14.9561	6.70239e-08	2.66085e-05
N-acetyltyrosine	Tyrosine Metabolism	Amino Acid	100001104	0.104077	1.87766e-07	5.59072e-05
X-17346			999917346	4.1869	3.48451e-07	8.30011e-05
X-24332			999924332	3.67825	5.76681e-07	0.000114471
glutamine conjugate of C8H12O2 (3)*	Partially Characterized Molecules	Partially Characterized Molecules	100020267	9.55783	1.0084e-06	0.000171572
maltol sulfate	Food Component/Plant	Xenobiotics	100006106	14.9965	1.49028e-06	0.000221865
N-acetylphenylalanine	Phenylalanine Metabolism	Amino Acid	100001256	0.141883	1.54406e-06	0.000204331
N-acetyltryptophan	Tryptophan Metabolism	Amino Acid	100001254	0.094162	1.77245e-06	0.000211098
3,4-dihydroxybutyrate	Fatty Acid, Dihydroxy	Lipid	100001730	2.75654	2.00294e-06	0.000216864
X-18886			999918886	3.95891	2.05347e-06	0.000203807
hexanoyltaurine	Endocannabinoid	Lipid	100021223	6.82081	2.31601e-06	0.000212182
N-acetylasparagine	Alanine and Aspartate Metabolism	Amino Acid	100001257	2.95714	2.58967e-06	0.000220307
nonenedioate (C9:1-DC)*	Fatty Acid, Dicarboxylate	Lipid	100019974	4.8077	2.68912e-06	0.000213516
arabonate/xylonate	Pentose Metabolism	Carbohydrate	100006115	2.3137	3.02411e-06	0.000225107
dexpanthenol	Chemical	Xenobiotics	100002376	0.26952	3.39382e-06	0.000237767
pyrraline	Food Component/Plant	Xenobiotics	100001767	6.76509	3.88034e-06	0.000256749
fucose	Aminosugar Metabolism	Carbohydrate	918	4.63986	4.61183e-06	0.000289089
1-methyl-5-imidazolelactate	Histidine Metabolism	Amino Acid	100021478	3.0719	5.40823e-06	0.00032206
homocitrate	TCA Cycle	Energy	100002554	2.6225	5.70407e-06	0.000323502
malonate	Fatty Acid Synthesis	Lipid	818	2.10452	5.82529e-06	0.00031536
N6-carboxymethyllysine	Advanced Glycation End-product	Carbohydrate	100001768	4.34137	6.33223e-06	0.000327899
ethylmalonate	Leucine, Isoleucine and Valine Metabolism	Amino Acid	2054	2.45406	8.34242e-06	0.000413992
phenylalanylhydroxyproline*	Dipeptide	Peptide	100021238	3.20809	8.70839e-06	0.000414868
1-methyl-5-imidazoleacetate	Histidine Metabolism	Amino Acid	100002910	2.54698	9.38615e-06	0.000429958
glucuronide of C12H22O4 (1)*	Partially Characterized Molecules	Partially Characterized Molecules	100019984	5.80776	1.25843e-05	0.000555107
glutamine conjugate of C8H12O2 (2)*	Partially Characterized Molecules	Partially Characterized Molecules	100020258	3.98743	1.26362e-05	0.000537492
methylsuccinate	Leucine, Isoleucine and Valine Metabolism	Amino Acid	2051	3.4512	1.27202e-05	0.000522407
X-23739			999923739	3.46004	1.32653e-05	0.000526633
glycine conjugate of C6H10O2 (1)*	Partially Characterized Molecules	Partially Characterized Molecules	100021679	7.301	1.4449e-05	0.000555122
choline	Phospholipid Metabolism	Lipid	1256	3.05215	1.76006e-05	0.000655071
1,5-anhydroglucitol (1,5-AG)	Glycolysis, Gluconeogenesis, and Pyruvate Metabolism	Carbohydrate	100000580	3.87542	2.11176e-05	0.000762152
X-21736			999921736	4.40094	2.11308e-05	0.0007402
X-24971			999924971	8.37022	2.15444e-05	0.000733125
X-12839			999912839	5.40354	2.31548e-05	0.000766037
X-17343			999917343	5.72804	2.45806e-05	0.000791229
glucoheptose	Food Component/Plant	Xenobiotics	100000852	3.12927	2.63001e-05	0.0008243
3-hydroxyhippurate	Benzoate Metabolism	Xenobiotics	100002122	5.60869	2.75782e-05	0.000842195
X-25790			999925790	4.432	2.79385e-05	0.000831869
X-24412			999924412	4.30262	3.14753e-05	0.000914318
vanillate	Food Component/Plant	Xenobiotics	100001634	4.24017	3.26375e-05	0.000925507
homostachydrine*	Food Component/Plant	Xenobiotics	100001550	10.8007	3.45982e-05	0.000958289
myo-inositol	Inositol Metabolism	Lipid	363	2.86578	3.61262e-05	0.000977872
citrate	TCA Cycle	Energy	1124	3.66472	3.66164e-05	0.000969114
glucuronide of C12H22O3 (1)*	Partially Characterized Molecules	Partially Characterized Molecules	100019995	7.93406	3.72067e-05	0.000963331
lyxonate	Pentose Metabolism	Carbohydrate	100019968	2.02269	3.84928e-05	0.000975425
glucuronide of C14H26O4 (1)*	Partially Characterized Molecules	Partially Characterized Molecules	100019986	7.12602	3.98855e-05	0.000989659
3-hydroxydodecanedioate*	Fatty Acid, Dicarboxylate	Lipid	100001454	5.74503	4.09941e-05	0.000996408
mannitol/sorbitol	Fructose, Mannose and Galactose Metabolism	Carbohydrate	100001740	0.266739	4.29994e-05	0.00102425
isocitric lactone	TCA Cycle	Energy	100009239	3.61985	4.30902e-05	0.00100628
homocitrulline	Urea cycle; Arginine and Proline Metabolism	Amino Acid	100000963	2.52636	4.3598e-05	0.000998561
N-acetylpyrraline	Food Component/Plant	Xenobiotics	100006120	19.9031	4.45882e-05	0.00100197
2,6-dihydroxybenzoic acid	Drug - Topical Agents	Xenobiotics	100020837	14.2391	4.51027e-05	0.000994765
X-25936			999925936	2.24284	4.87944e-05	0.00105662
lanthionine	Methionine, Cysteine, SAM and Taurine Metabolism	Amino Acid	100003892	1.76516	5.09054e-05	0.00108265
X-25855			999925855	1.9636	5.16959e-05	0.00108017
betaine	Glycine, Serine and Threonine Metabolism	Amino Acid	799	2.05422	6.22798e-05	0.00127888
X-22162			999922162	1.87369	6.52421e-05	0.00131701
X-13684			999913684	3.43798	6.91482e-05	0.00137259
cyclo(pro-sulfo-tyr)*	Dipeptide	Peptide	100020992	5.68439	7.46734e-05	0.00145797
glycerate	Glycolysis, Gluconeogenesis, and Pyruvate Metabolism	Carbohydrate	1052	2.12055	7.68338e-05	0.00147595
3-hydroxyhippurate sulfate	Benzoate Metabolism	Xenobiotics	100020410	5.88065	7.94082e-05	0.00150119
ribonate	Pentose Metabolism	Carbohydrate	100001007	1.75193	8.00649e-05	0.00148996
5-hydroxyindoleacetate	Tryptophan Metabolism	Amino Acid	71	2.08831	8.28633e-05	0.00151831
cyclo(gly-pro)	Dipeptide	Peptide	100001946	2.08894	8.86039e-05	0.0015989
indoleacetylglutamine	Tryptophan Metabolism	Amino Acid	100001731	3.2448	9.2858e-05	0.00165065
2-iminopiperidine	Chemical	Xenobiotics	100021018	3.81604	9.63496e-05	0.00168753
X-15486			999915486	3.08248	9.80429e-05	0.0016923
N-acetylglutamate	Glutamate Metabolism	Amino Acid	100000282	2.09015	0.000101102	0.00172017
X-17335			999917335	3.83553	0.000101486	0.0017024
X-21829			999921829	4.71844	0.000101649	0.00168144
indoleacetate	Tryptophan Metabolism	Amino Acid	100001034	5.00231	0.000104691	0.00170804
succinate	TCA Cycle	Energy	252	2.54384	0.000105848	0.00170359
X-23678			999923678	3.72327	0.000110986	0.00176246
nicotinamide riboside	Nicotinate and Nicotinamide Metabolism	Cofactors and Vitamins	100001310	2.04459	0.000117234	0.00183717
X-23657			999923657	6.2906	0.000129242	0.00199906
2,3-dihydroxy-2-methylbutyrate	Leucine, Isoleucine and Valine Metabolism	Amino Acid	100010869	2.18326	0.000130353	0.0019904
2-octenoylglycine	Fatty Acid Metabolism (Acyl Glycine)	Lipid	100016114	6.76397	0.000132059	0.00199091
X-24583			999924583	2.2227	0.000134781	0.00200655
N,N-dimethyl-pro-pro	Modified Peptides	Peptide	100022041	1.76314	0.000137343	0.00201945
glutamine conjugate of C9H16O2 (1)*	Partially Characterized Molecules	Partially Characterized Molecules	100021684	6.40975	0.000140749	0.00204429
X-24469			999924469	3.14668	0.00014934	0.00214294
glutamine_degradant*	Partially Characterized Molecules	Partially Characterized Molecules	100001540	3.91432	0.0001579	0.00223879
allantoin	Purine Metabolism, (Hypo)Xanthine/Inosine containing	Nucleotide	1002	2.54901	0.000164017	0.00229817
cyclo(his-pro)	Dipeptide	Peptide	100002745	2.08441	0.000177104	0.00245268
3-methylhistidine	Histidine Metabolism	Amino Acid	100000042	2.18294	0.000178479	0.00244332
pantothenate	Pantothenate and CoA Metabolism	Cofactors and Vitamins	1024	4.9099	0.00018626	0.00252087
3-hydroxyoctanoylglycine	Fatty Acid Metabolism (Acyl Glycine)	Lipid	100020633	4.99595	0.000186555	0.00249648
glucuronide of C10H18O2 (12)*	Partially Characterized Molecules	Partially Characterized Molecules	100020019	3.8781	0.000204347	0.00270419
3-methyladipate	Fatty Acid, Dicarboxylate	Lipid	100001765	3.02833	0.00022159	0.00290015
glutamine conjugate of C6H10O2 (2)*	Partially Characterized Molecules	Partially Characterized Molecules	100020262	5.10672	0.000222967	0.00288645
glucuronide of C12H22O4 (2)*	Partially Characterized Molecules	Partially Characterized Molecules	100019985	4.99447	0.000223459	0.00286171
1-methylguanine	Purine Metabolism, Guanine containing	Nucleotide	100001133	6.1296	0.000230522	0.00292076
X-17325			999917325	53.1968	0.000232938	0.00292031
N6-carbamoylthreonyladenosine	Purine Metabolism, Adenine containing	Nucleotide	100001415	1.73415	0.000249599	0.00309658
fructosyllysine	Lysine Metabolism	Amino Acid	100005373	3.21308	0.000252871	0.00310484
dimethylarginine (SDMA + ADMA)	Urea cycle; Arginine and Proline Metabolism	Amino Acid	100001810	1.72121	0.000256851	0.00312152
2,8-quinolinediol sulfate	Food Component/Plant	Xenobiotics	100004321	297.081	0.000264807	0.00318571
glutarate (C5-DC)	Fatty Acid, Dicarboxylate	Lipid	339	2.64778	0.000265124	0.00315763
adipoylcarnitine (C6-DC)	Fatty Acid Metabolism (Acyl Carnitine, Dicarboxylate)	Lipid	100006614	4.16364	0.000276917	0.00326543
X-23648			999923648	1.99887	0.000281224	0.00328371
2-octenoylglutamine	Fatty Acid Metabolism (Acyl Glutamine)	Lipid	100016113	4.96874	0.000284469	0.00328934
S-methylcysteine sulfoxide	Methionine, Cysteine, SAM and Taurine Metabolism	Amino Acid	100002927	4.51985	0.000284558	0.00325874
hexanoylglutamine	Fatty Acid Metabolism (Acyl Glutamine)	Lipid	100001733	5.6783	0.00028958	0.00328466
sarcosine	Glycine, Serine and Threonine Metabolism	Amino Acid	1023	2.56681	0.000291556	0.00327588
5-hydroxymethyl-2-furoic acid	Tyrosine Metabolism	Amino Acid	100003954	0.378021	0.000293401	0.0032658
N-methylproline	Urea cycle; Arginine and Proline Metabolism	Amino Acid	100001956	4.20185	0.00031049	0.00342402
glycine conjugate of C10H14O2 (1)*	Partially Characterized Molecules	Partially Characterized Molecules	100020254	3.72698	0.000313091	0.00342103
asparagine	Alanine and Aspartate Metabolism	Amino Acid	917	3.97145	0.000315837	0.00341966
heptenedioate (C7:1-DC)*	Fatty Acid, Dicarboxylate	Lipid	100019981	10.3372	0.000317302	0.00340456
X-23659			999923659	2.45789	0.000319552	0.00339809
leucylhydroxyproline*	Dipeptide Derivative	Peptide	100021261	3.31426	0.000323378	0.00340835
indoleacetylglycine	Tryptophan Metabolism	Amino Acid	100006730	9.84273	0.000326068	0.00340656
suberate (C8-DC)	Fatty Acid, Dicarboxylate	Lipid	100000016	4.10567	0.000330329	0.00342106
X-18888			999918888	6.32898	0.000332874	0.00341769
X-16580			999916580	2.49853	0.000343616	0.00349784
3-hydroxysuberate	Fatty Acid, Monohydroxy	Lipid	100001143	8.34577	0.000357743	0.00361078
glycine conjugate of C9H16O2*	Partially Characterized Molecules	Partially Characterized Molecules	100020256	3.01344	0.000363365	0.0036367
hexanoylglycine	Fatty Acid Metabolism (Acyl Glycine)	Lipid	100001527	3.20907	0.000367917	0.00365158
N6,N6,N6-trimethyllysine	Lysine Metabolism	Amino Acid	189	1.64409	0.00036805	0.00362271
X-21364			999921364	2.03714	0.000372404	0.00363552
piperidine	Food Component/Plant	Xenobiotics	100002398	24.4564	0.000373353	0.00361515
3-hydroxysebacate	Fatty Acid, Monohydroxy	Lipid	100001145	9.1143	0.000377343	0.00362432
xanthine	Purine Metabolism, (Hypo)Xanthine/Inosine containing	Nucleotide	1004	2.45768	0.000385796	0.00367586
N-acetylkynurenine (2)	Tryptophan Metabolism	Amino Acid	100006378	0.110566	0.000400782	0.00378834
delta-CEHC sulfate	Tocopherol Metabolism	Cofactors and Vitamins	100020484	0.381676	0.00041314	0.0038744
3-hydroxy-2-methylpyridine sulfate	Chemical	Xenobiotics	100020975	8.21124	0.000424262	0.00394763
N6-acetyllysine	Lysine Metabolism	Amino Acid	100001734	1.94471	0.000424505	0.00391926
N-succinyl-leucine	Leucine, Isoleucine and Valine Metabolism	Amino Acid	100021476	2.21023	0.000435805	0.00399264
trans-2-hexenoylglycine	Fatty Acid Metabolism (Acyl Glycine)	Lipid	100019884	3.61499	0.000457544	0.00415981
X-17825			999917825	2.69936	0.000473787	0.00427485
pro-hydroxy-pro	Urea cycle; Arginine and Proline Metabolism	Amino Acid	100001167	1.93299	0.000475497	0.00425803
5-hydroxylysine	Lysine Metabolism	Amino Acid	100000054	1.91868	0.000476234	0.0042328
methylmalonate (MMA)	Fatty Acid Metabolism (also BCAA Metabolism)	Lipid	418	2.15303	0.000489139	0.00431529
X-16397			999916397	2.29879	0.000493048	0.0043178
succinoyltaurine	Methionine, Cysteine, SAM and Taurine Metabolism	Amino Acid	100021220	3.61285	0.000496211	0.00431378
X-12096			999912096	1.76941	0.000500499	0.00431953
X-24680			999924680	1.95319	0.000501431	0.00429643
X-25454			999925454	1.77207	0.00050653	0.00430912
imidazole lactate	Histidine Metabolism	Amino Acid	100000263	3.18331	0.000517073	0.00436762
ferulic acid 4-sulfate	Food Component/Plant	Xenobiotics	100005389	3.95656	0.000532173	0.0044635
X-23644			999923644	4.10205	0.000554812	0.00462085
N-acetylproline	Urea cycle; Arginine and Proline Metabolism	Amino Acid	100001334	0.615664	0.000570869	0.00472156
5-methylthioribose**	Methionine, Cysteine, SAM and Taurine Metabolism	Amino Acid	100002103	1.6772	0.000590012	0.00484623
phenylacetylglutamine	Acetylated Peptides	Peptide	100001417	2.09804	0.000590668	0.00481839
X-25955			999925955	3.00214	0.00059117	0.00478968
N-octanoylglutamine	Fatty Acid Metabolism (Acyl Glutamine)	Lipid	100003941	15.1762	0.000610831	0.00491554
creatinine	Creatine Metabolism	Amino Acid	275	1.54912	0.000621334	0.0049665
erythronate*	Aminosugar Metabolism	Carbohydrate	100001320	1.47841	0.000633293	0.00502835
X-23593			999923593	2.03873	0.000636262	0.00501846
2-O-methylascorbic acid	Ascorbate and Aldarate Metabolism	Cofactors and Vitamins	100003258	1.62971	0.000646226	0.00506352
N1-Methyl-2-pyridone-5-carboxamide	Nicotinate and Nicotinamide Metabolism	Cofactors and Vitamins	100001468	2.42799	0.00065424	0.00509281
maleate	Fatty Acid, Dicarboxylate	Lipid	100000707	1.74382	0.000657665	0.00508623
vanillic acid glycine	Food Component/Plant	Xenobiotics	100021363	3.35602	0.000658105	0.0050568
p-cresol glucuronide*	Tyrosine Metabolism	Amino Acid	100006191	2.41947	0.000686551	0.00524155
X-10457			999910457	2.84802	0.000686739	0.00520959
X-12015			999912015	1.69155	0.000692029	0.00521649
methylsuccinoylcarnitine	Leucine, Isoleucine and Valine Metabolism	Amino Acid	100009275	3.29	0.000722459	0.00541162
isocitrate	TCA Cycle	Energy	1206	2.35061	0.000734005	0.00546375
N-acetylalliin	Food Component/Plant	Xenobiotics	100005367	5.88465	0.00073919	0.00546817
4-acetamidobutanoate	Polyamine Metabolism	Amino Acid	1113	1.66527	0.000757001	0.00556536
X-12714			999912714	3.27038	0.000831423	0.006075
N,N,N-trimethyl-alanylproline betaine (TMAP)	Urea cycle; Arginine and Proline Metabolism	Amino Acid	100020217	1.77147	0.000842029	0.00611498
X-24763			999924763	2.70938	0.000879892	0.00635122
3-methylxanthine	Xanthine Metabolism	Xenobiotics	100001108	5.68677	0.000883474	0.00633866
X-24333			999924333	4.17556	0.000896039	0.00639032
X-12104			999912104	1.67115	0.00089989	0.00637958
4-methylcatechol sulfate	Benzoate Metabolism	Xenobiotics	100004111	2.98379	0.000940424	0.00662748
(2-butoxyethoxy)acetic acid	Chemical	Xenobiotics	100021457	2.83554	0.000969594	0.00679286
arabitol/xylitol	Pentose Metabolism	Carbohydrate	100006430	1.57703	0.000977065	0.00680518
abscisate	Food Component/Plant	Xenobiotics	100000879	0.441846	0.000988842	0.00684716
carboxyethyl-GABA	Glutamate Metabolism	Amino Acid	100003260	1.86193	0.00100862	0.00694372
fucitol	Food Component/Plant	Xenobiotics	100002455	1.98978	0.00102835	0.00703891
sedoheptulose	Pentose Metabolism	Carbohydrate	100002619	1.63836	0.00106564	0.00725247
mevalonolactone	Mevalonate Metabolism	Lipid	100000772	2.81432	0.00107365	0.00726545
N-acetylneuraminate	Aminosugar Metabolism	Carbohydrate	1162	2.40135	0.00109884	0.00739387
adenine	Purine Metabolism, Adenine containing	Nucleotide	880	3.26923	0.00110507	0.00739402
3-hydroxy-3-methylglutarate	Mevalonate Metabolism	Lipid	112	2.96509	0.00112937	0.00751441
dimethylglycine	Glycine, Serine and Threonine Metabolism	Amino Acid	806	2.3303	0.00115053	0.00761265
succinylcarnitine (C4-DC)	TCA Cycle	Energy	100001948	1.99144	0.00115164	0.00757795
X-24337			999924337	2.86539	0.00115945	0.0075874
4-hydroxyphenylacetylglycine	Acetylated Peptides	Peptide	100004418	4.78851	0.00117269	0.00763213
succinylglutamine	Glutamate Metabolism	Amino Acid	100010853	6.0065	0.00119461	0.0077325
3-hydroxyadipate	Fatty Acid, Dicarboxylate	Lipid	100004396	3.16238	0.0011962	0.00770093
glycine conjugate of C10H12O2*	Partially Characterized Molecules	Partially Characterized Molecules	100020253	4.48827	0.00121521	0.00778126
X-13507			999913507	0.354013	0.00122399	0.00779557
X-17688			999917688	3.79791	0.00129225	0.00818655
ascorbic acid 3-sulfate*	Ascorbate and Aldarate Metabolism	Cofactors and Vitamins	100020409	5.35353	0.00130679	0.00823485
X-24345			999924345	4.50282	0.00131429	0.00823853
urate	Purine Metabolism, (Hypo)Xanthine/Inosine containing	Nucleotide	1134	1.95213	0.00134135	0.00836414
hydroxyasparagine**	Alanine and Aspartate Metabolism	Amino Acid	100020205	1.60113	0.0013863	0.00859942
X-12221			999912221	52.1678	0.00139734	0.00862296
oxalate (ethanedioate)	Ascorbate and Aldarate Metabolism	Cofactors and Vitamins	100000841	2.17483	0.00139799	0.00858251
threonate	Ascorbate and Aldarate Metabolism	Cofactors and Vitamins	100001022	1.76153	0.00141363	0.00863403
aspartate	Alanine and Aspartate Metabolism	Amino Acid	234	5.53425	0.00142929	0.0086851
X-12267			999912267	22.8515	0.00146196	0.00883856
4-quinolinecarboxylic acid	Chemical	Xenobiotics	100021550	0.31192	0.00151147	0.00909172
ribitol	Pentose Metabolism	Carbohydrate	100000406	1.85868	0.00153221	0.00917018
O-sulfo-L-tyrosine	Chemical	Xenobiotics	100005384	1.70916	0.00153508	0.00914142
4-hydroxyhippurate	Benzoate Metabolism	Xenobiotics	100001423	1.89934	0.00155268	0.00920018
X-17365			999917365	3.77429	0.00157234	0.00927056
X-12007			999912007	3.58034	0.00166088	0.00974438
X-23780			999923780	1.95087	0.00167029	0.00975154
X-13866			999913866	4.43222	0.00172152	0.0100016
X-12834			999912834	10.04	0.00172459	0.00997079
hypoxanthine	Purine Metabolism, (Hypo)Xanthine/Inosine containing	Nucleotide	171	2.48593	0.00177829	0.0102316
4-hydroxyphenylacetylglutamine	Acetylated Peptides	Peptide	100010850	4.55534	0.00183676	0.0105172
7-methylxanthine	Xanthine Metabolism	Xenobiotics	100001396	5.21865	0.00185946	0.0105963
2-pyrrolidinone	Glutamate Metabolism	Amino Acid	100001081	1.56876	0.00187445	0.0106308
7-methylguanine	Purine Metabolism, Guanine containing	Nucleotide	100001456	1.55591	0.00192171	0.0108472
butyrylputrescine/isobutyrylputrescine	Polyamine Metabolism	Amino Acid	100021922	1.71523	0.00195906	0.0110058
furaneol sulfate	Food Component/Plant	Xenobiotics	100009328	2.63264	0.00196208	0.0109711
p-cresol sulfate	Benzoate Metabolism	Xenobiotics	100001315	2.46596	0.00196248	0.010922
X-12706			999912706	3.41816	0.00200836	0.0111254
X-23639			999923639	4.31475	0.00201524	0.0111118
X-17300			999917300	0.326102	0.0020283	0.0111323
X-24341			999924341	4.45691	0.00202887	0.0110843
X-12707			999912707	1.86322	0.00205556	0.0111789
trans-4-hydroxyproline	Urea cycle; Arginine and Proline Metabolism	Amino Acid	1001	2.50852	0.00206171	0.0111614
erythritol	Food Component/Plant	Xenobiotics	100000846	1.72217	0.00207337	0.0111737
X-24340			999924340	2.13923	0.00213793	0.0114697
1-methylhypoxanthine	Purine Metabolism, (Hypo)Xanthine/Inosine containing	Nucleotide	100004644	3.06774	0.00224765	0.0120043
stachydrine	Food Component/Plant	Xenobiotics	100001296	3.09998	0.00226268	0.0120306
X-24588			999924588	3.16169	0.00238671	0.0126337
6-bromotryptophan	Tryptophan Metabolism	Amino Acid	100020414	3.04332	0.00241237	0.012713
adipate (C6-DC)	Fatty Acid, Dicarboxylate	Lipid	100000863	3.85078	0.00254219	0.0133381
alanine	Alanine and Aspartate Metabolism	Amino Acid	811	1.90611	0.00254936	0.0133171
N-delta-acetylornithine	Urea cycle; Arginine and Proline Metabolism	Amino Acid	100004523	2.87714	0.00258871	0.0134635
isoputreanine	Polyamine Metabolism	Amino Acid	100003262	1.68746	0.00259012	0.0134123
suberoylcarnitine (C8-DC)	Fatty Acid Metabolism (Acyl Carnitine, Dicarboxylate)	Lipid	100006627	5.62605	0.00260867	0.0134499
X-18887			999918887	1.73408	0.00266157	0.0136635
hydroxy-N6,N6,N6-trimethyllysine*	Lysine Metabolism	Amino Acid	100021123	1.58986	0.00266341	0.0136143
3-hydroxypyridine sulfate	Chemical	Xenobiotics	100006098	3.67191	0.00270239	0.0137545
N-succinyl-isoleucine	Leucine, Isoleucine and Valine Metabolism	Amino Acid	100021477	2.17034	0.00273265	0.0138493
X-12906			999912906	1.61693	0.00277062	0.0139823
X-25420			999925420	5.92229	0.00279699	0.0140558
X-13837			999913837	3.9775	0.00281743	0.014099
nicotinamide N-oxide	Nicotinate and Nicotinamide Metabolism	Cofactors and Vitamins	100002763	3.42265	0.00286829	0.0142934
X-24468			999924468	2.04809	0.00291443	0.0144629
3-(3-hydroxyphenyl)propionate sulfate	Benzoate Metabolism	Xenobiotics	100005391	11.3671	0.0029573	0.0146147
2'-O-methylcytidine	Pyrimidine Metabolism, Cytidine containing	Nucleotide	100010895	1.84468	0.0030639	0.015079
X-25442			999925442	4.97935	0.00306637	0.015029
2-aminoadipate	Lysine Metabolism	Amino Acid	381	1.97398	0.00307253	0.0149975
3'-a-sialyl-N-acetyllactosamine	Aminosugar Metabolism	Carbohydrate	100003257	1.66988	0.00311143	0.0151254
1-methylxanthine	Xanthine Metabolism	Xenobiotics	100001405	3.12529	0.00317612	0.0153771
X-12026			999912026	5.67686	0.00320618	0.0154598
succinimide	Chemical	Xenobiotics	100003696	1.75568	0.00321367	0.0154334
pimeloylcarnitine/3-methyladipoylcarnitine (C7-DC)	Fatty Acid Metabolism (Acyl Carnitine, Dicarboxylate)	Lipid	100009407	2.82697	0.00322968	0.015448
acisoga	Polyamine Metabolism	Amino Acid	100004541	3.1224	0.00323695	0.0154208
X-25520			999925520	3.12987	0.00326915	0.0155122
X-13688			999913688	7.64178	0.00327424	0.0154747
N-acetylthreonine	Glycine, Serine and Threonine Metabolism	Amino Acid	100001274	1.50316	0.00328229	0.0154514
X-25983			999925983	2.2047	0.00335447	0.015729
X-23429			999923429	5.06899	0.00337012	0.0157404
taurine	Methionine, Cysteine, SAM and Taurine Metabolism	Amino Acid	512	1.94566	0.00343784	0.015994
X-17682			999917682	2.98816	0.00345306	0.0160023
serotonin	Tryptophan Metabolism	Amino Acid	504	2.02309	0.00345715	0.0159592
2-acetamidophenol sulfate	Food Component/Plant	Xenobiotics	100006190	4.41865	0.00346448	0.0159313
X-24465			999924465	1.79009	0.00356508	0.0163308
glucuronide of C14H26O4 (2)*	Partially Characterized Molecules	Partially Characterized Molecules	100020009	5.03403	0.0035795	0.016334
X-23645			999923645	3.01976	0.00361503	0.0164332
vanillylmandelate (VMA)	Tyrosine Metabolism	Amino Acid	1111	1.61173	0.00374337	0.0169519
X-12013			999912013	2.40358	0.00379017	0.0170989
cinnamoylglycine	Food Component/Plant	Xenobiotics	100002253	7.90155	0.00383597	0.0172401
N-methylpipecolate	Bacterial/Fungal	Xenobiotics	100005383	3.03493	0.00386046	0.017285
X-17438			999917438	12.6112	0.00388501	0.0173297
sebacate (C10-DC)	Fatty Acid, Dicarboxylate	Lipid	100001211	8.7435	0.00398897	0.0177271
tartronate (hydroxymalonate)	Food Component/Plant	Xenobiotics	100000840	2.72693	0.00402831	0.0178354
xanthurenate	Tryptophan Metabolism	Amino Acid	100000015	1.5036	0.0041124	0.0181403
3-hydroxyhexanoate	Fatty Acid, Monohydroxy	Lipid	100006367	2.81445	0.00411249	0.0180737
1-methylhistidine	Histidine Metabolism	Amino Acid	100001051	1.55715	0.00426701	0.0186838
pimelate (C7-DC)	Fatty Acid, Dicarboxylate	Lipid	100000101	2.09305	0.00427035	0.01863
N3-methyluridine	Pyrimidine Metabolism, Uracil containing	Nucleotide	100001424	1.54237	0.00428906	0.0186433
isovalerylcarnitine (C5)	Leucine, Isoleucine and Valine Metabolism	Amino Acid	100001393	0.188268	0.00442347	0.0191576
C-glycosyltryptophan	Tryptophan Metabolism	Amino Acid	100006379	1.51829	0.00447726	0.0193204
pyridoxamine	Vitamin B6 Metabolism	Cofactors and Vitamins	568	1.97187	0.0046323	0.0199172
3-hydroxybutyroylglycine**	Fatty Acid Metabolism (Acyl Glycine)	Lipid	100020211	2.7452	0.00465162	0.0199283
X-24328			999924328	1.96015	0.00468559	0.0200019
N,N-dimethyl-5-aminovalerate	Lysine Metabolism	Amino Acid	100020842	5.11683	0.00468612	0.0199327
prolylglycine	Dipeptide	Peptide	100003674	1.53498	0.00471628	0.0199896
N2,N2-dimethylguanosine	Purine Metabolism, Guanine containing	Nucleotide	100001412	1.48552	0.00472128	0.0199399
maltotriose	Glycogen Metabolism	Carbohydrate	100000276	0.33021	0.00479263	0.0201697
gamma-carboxyglutamate	Glutamate Metabolism	Amino Acid	100002679	1.89787	0.00490779	0.0205816
1-methylurate	Xanthine Metabolism	Xenobiotics	100001400	2.18209	0.00494245	0.0206542
X-13844			999913844	4.95095	0.00497405	0.0207136
3-(3-amino-3-carboxypropyl)uridine*	Pyrimidine Metabolism, Uracil containing	Nucleotide	100001426	1.48603	0.0049948	0.0207275
lactose	Disaccharides and Oligosaccharides	Carbohydrate	393	2.15023	0.00500377	0.0206927
glutamine conjugate of C7H12O2*	Partially Characterized Molecules	Partially Characterized Molecules	100020259	7.67629	0.00504381	0.0207861
2-butenoylglycine	Fatty Acid Metabolism (Acyl Glycine)	Lipid	100016110	1.83332	0.00505891	0.0207764
uracil	Pyrimidine Metabolism, Uracil containing	Nucleotide	825	3.58395	0.00506396	0.0207257
3-ureidopropionate	Pyrimidine Metabolism, Uracil containing	Nucleotide	1053	1.8399	0.00513585	0.0209479
N-acetylglucosaminitol	Aminosugar Metabolism	Carbohydrate	100021518	1.65973	0.00523488	0.021279
asymetric dimethylarginine (ADMA)	Urea cycle; Arginine and Proline Metabolism	Amino Acid	100000040	1.76169	0.00524574	0.0212506
X-24387			999924387	1.58484	0.0052547	0.0212147
X-24411			999924411	0.583554	0.00527926	0.0212419
N-acetylcitrulline	Urea cycle; Arginine and Proline Metabolism	Amino Acid	100001577	0.423743	0.00539128	0.0216196
cis-aconitate	TCA Cycle	Energy	1829	1.70375	0.00544509	0.0217621
isocaproylcarnitine	Fatty Acid Metabolism (Acyl Carnitine, Short Chain)	Lipid	100016063	0.240145	0.00548574	0.0218512
azeloylcarnitine (C9-DC)	Fatty Acid Metabolism (Acyl Carnitine, Dicarboxylate)	Lipid	100006630	2.57419	0.00549307	0.0218075
X-24587			999924587	0.331509	0.0055828	0.0220901
X-18345			999918345	3.78609	0.00560534	0.0221058
catechol sulfate	Benzoate Metabolism	Xenobiotics	100001605	4.64776	0.00566817	0.0222799
7-methylguanosine	Purine Metabolism, Guanine containing	Nucleotide	100001118	0.430996	0.00568554	0.0222746
N-acetylaspartate (NAA)	Alanine and Aspartate Metabolism	Amino Acid	100000787	1.6859	0.00583969	0.0228035
3-methoxytyrosine	Tyrosine Metabolism	Amino Acid	1342	2.19094	0.00584565	0.0227522
S-1-pyrroline-5-carboxylate	Glutamate Metabolism	Amino Acid	35	0.523601	0.00591448	0.0229451
glutamate	Glutamate Metabolism	Amino Acid	561	5.68658	0.00591787	0.0228837
3-acetylphenol sulfate	Chemical	Xenobiotics	100004326	1.67112	0.00627536	0.0241876
1-methyladenine	Purine Metabolism, Adenine containing	Nucleotide	54	6.53894	0.00628737	0.0241557
pseudouridine	Pyrimidine Metabolism, Uracil containing	Nucleotide	821	1.46596	0.00637246	0.0244038
X-25546			999925546	0.42549	0.0063738	0.0243307
X-17323			999917323	2.53718	0.00644674	0.0245306
X-12411			999912411	2.4119	0.00647946	0.0245766
N-acetylputrescine	Polyamine Metabolism	Amino Acid	192	1.64458	0.00649783	0.024568
X-24808			999924808	3.36087	0.0065724	0.0247713
3-hydroxyhexanoylcarnitine (1)	Fatty Acid Metabolism (Acyl Carnitine, Hydroxy)	Lipid	100020825	2.15252	0.00659019	0.02476
5,6-dihydrouracil	Pyrimidine Metabolism, Uracil containing	Nucleotide	1125	2.42509	0.00660984	0.0247557
N6-methyllysine	Lysine Metabolism	Amino Acid	100003415	1.78155	0.006632	0.0247609
isoleucylhydroxyproline*	Dipeptide Derivative	Peptide	100021262	2.74432	0.0066369	0.0247017
X-24807			999924807	3.66299	0.00671526	0.0249155
S-(3-hydroxypropyl)mercapturic acid (HPMA)	Chemical	Xenobiotics	100004568	2.3826	0.00689439	0.0255007
X-26062			999926062	7.10455	0.00691485	0.0254972
N-formylanthranilic acid	Tryptophan Metabolism	Amino Acid	100004561	3.377	0.00696876	0.0256166
(S)-a-amino-omega-caprolactam	Food Component/Plant	Xenobiotics	100021329	1.44753	0.00701379	0.0257029
3-methylurate*	Xanthine Metabolism	Xenobiotics	100004049	6.80532	0.00703673	0.0257078
N-acetylhistamine	Histidine Metabolism	Amino Acid	100006123	2.49695	0.00707519	0.0257693
X-17342			999917342	2.06635	0.00722688	0.0262415
ascorbic acid 2-sulfate	Ascorbate and Aldarate Metabolism	Cofactors and Vitamins	100009329	2.60891	0.00740805	0.0268176
beta-citrylglutamate	Glutamate Metabolism	Amino Acid	100003271	1.75428	0.00762063	0.0275035
2-hydroxyphenylacetate	Phenylalanine Metabolism	Amino Acid	235	1.77466	0.00769556	0.0276901
S-adenosylmethionine (SAM)	Methionine, Cysteine, SAM and Taurine Metabolism	Amino Acid	1263	0.354667	0.00783718	0.0281147
guanidinoacetate	Creatine Metabolism	Amino Acid	344	2.94682	0.00784162	0.0280462
trans-urocanate	Histidine Metabolism	Amino Acid	537	2.06381	0.00793267	0.0282869
X-12379			999912379	26.3871	0.00794302	0.0282392
X-11612			999911612	1.65463	0.00794387	0.0281582
guaiacol sulfate	Benzoate Metabolism	Xenobiotics	100004208	1.55314	0.00800971	0.0283073
7-methylurate	Xanthine Metabolism	Xenobiotics	100002241	4.47841	0.00822677	0.0289884
2'-O-methyluridine	Pyrimidine Metabolism, Uracil containing	Nucleotide	100010896	2.15893	0.00827586	0.0290754
N1,N12-diacetylspermine	Polyamine Metabolism	Amino Acid	100002132	1.7831	0.00831386	0.029123
malate	TCA Cycle	Energy	409	2.09648	0.00838	0.0292686
3-S-cysteinyl-2-methylpropanoate*	Chemical	Xenobiotics	100020488	2.30863	0.00847701	0.0295208
3-methoxycatechol sulfate (1)	Benzoate Metabolism	Xenobiotics	100006375	26.3663	0.00854147	0.0296586
X-12718			999912718	4.42528	0.00860365	0.0297876
X-12261			999912261	2.06039	0.00863612	0.0298134
N6,N6-dimethyllysine	Lysine Metabolism	Amino Acid	100020417	2.01805	0.00863693	0.02973
decadienedioic acid (C10:2-DC)**	Fatty Acid, Dicarboxylate	Lipid	100021711	2.28035	0.00869701	0.0298506
X-12407			999912407	25.2779	0.0087934	0.0300946
2-methylserine	Glycine, Serine and Threonine Metabolism	Amino Acid	100009246	2.44228	0.00880092	0.0300341
4-octenedioate	Fatty Acid, Dicarboxylate	Lipid	100001152	1.77399	0.00880514	0.0299626
isocaproylglutamine	Fatty Acid Metabolism (Acyl Glutamine)	Lipid	100019815	2.08218	0.00886801	0.0300906
malonylcarnitine	Fatty Acid Synthesis	Lipid	100001526	1.73541	0.00887916	0.0300428
imidazole propionate	Histidine Metabolism	Amino Acid	100003434	4.83822	0.00894521	0.0301806
X-24406			999924406	2.06161	0.00896117	0.030149
N-octanoylglycine	Fatty Acid Metabolism (Acyl Glycine)	Lipid	100003940	24.308	0.00899967	0.0301933
1,7-dimethylurate	Xanthine Metabolism	Xenobiotics	100001399	3.08257	0.00908371	0.0303896
tryptophan betaine	Tryptophan Metabolism	Amino Acid	100001743	2.07972	0.00911904	0.0304223
diglycerol	Chemical	Xenobiotics	100003700	204.324	0.00928609	0.0308931
glutamine conjugate of C8H12O2 (1)*	Partially Characterized Molecules	Partially Characterized Molecules	100020257	1.7319	0.00948037	0.0314516
phenylacetylglycine	Acetylated Peptides	Peptide	100001275	22.0192	0.00949317	0.0314066
cis-urocanate	Histidine Metabolism	Amino Acid	100003425	2.10677	0.00967256	0.0319114
X-21283			999921283	1.41326	0.0097787	0.0321725
chiro-inositol	Inositol Metabolism	Lipid	100001859	1.50624	0.00978565	0.0321066
acesulfame	Food Component/Plant	Xenobiotics	100006203	53.175	0.00983228	0.032171
2-hydroxybutyrate/2-hydroxyisobutyrate	Glutathione Metabolism	Amino Acid	100008928	2.54929	0.00990271	0.0323127
indolepropionylglycine	Tryptophan Metabolism	Amino Acid	100010863	3.17357	0.0100467	0.0326929
X-13874			999913874	2.22809	0.0100551	0.0326312
methionine sulfone	Methionine, Cysteine, SAM and Taurine Metabolism	Amino Acid	100004635	1.64834	0.0101782	0.0329409
X-11979			999911979	1.61435	0.0103565	0.0334269
5-acetylamino-6-amino-3-methyluracil	Xanthine Metabolism	Xenobiotics	100001403	4.75918	0.0109598	0.0352786
adenosine 3',5'-cyclic monophosphate (cAMP)	Purine Metabolism, Adenine containing	Nucleotide	207	1.70151	0.0110051	0.035329
glycocholate	Primary Bile Acid Metabolism	Lipid	342	3.49843	0.0110447	0.035361
5,6-dihydrothymine	Pyrimidine Metabolism, Thymine containing	Nucleotide	158	1.96525	0.0110687	0.0353426
taurohyocholate*	Secondary Bile Acid Metabolism	Lipid	100004084	2.6747	0.0111372	0.0354662
7-ketodeoxycholate	Secondary Bile Acid Metabolism	Lipid	100001063	2.14194	0.0114244	0.0362838
3-hydroxyproline	Urea cycle; Arginine and Proline Metabolism	Amino Acid	100002089	1.73422	0.0114291	0.0362023
4-methylhexanoylglutamine	Fatty Acid Metabolism (Acyl Glutamine)	Lipid	100020631	11.2861	0.0114715	0.0362401
cyclo(pro-hydroxypro)*	Dipeptide	Peptide	100021102	1.75391	0.0115211	0.0363008
cis-3,4-methyleneheptanoylglycine	Fatty Acid Metabolism (Acyl Glycine)	Lipid	100021992	1.98911	0.0117341	0.0368741
X-24352			999924352	8.94835	0.0120915	0.0378974
N-acetyl-isoputreanine	Polyamine Metabolism	Amino Acid	100020487	1.44216	0.0121391	0.0379466
xanthosine	Purine Metabolism, (Hypo)Xanthine/Inosine containing	Nucleotide	100000299	1.52619	0.0122044	0.0380508
X-13693			999913693	1.81872	0.012528	0.0389578
lacto-N-fucopentaose II	Disaccharides and Oligosaccharides	Carbohydrate	100002936	2.70228	0.0125979	0.0390733
N2-methylguanosine	Purine Metabolism, Guanine containing	Nucleotide	100001467	1.63472	0.0126929	0.0392656
4-hydroxycatechol sulfate	Benzoate Metabolism	Xenobiotics	100006169	3.43174	0.0127523	0.0393471
6-hydroxyindole sulfate	Chemical	Xenobiotics	100006260	6.27792	0.0128116	0.0394281
ciliatine (2-aminoethylphosphonate)	Food Component/Plant	Xenobiotics	100000086	3.25456	0.0128277	0.0393757
glucuronide of C8H16O2 (2)*	Partially Characterized Molecules	Partially Characterized Molecules	100020099	20.1176	0.012861	0.0393765
X-22508			999922508	4.64193	0.0130973	0.0399971
3-(4-hydroxyphenyl)propionate	Benzoate Metabolism	Xenobiotics	100002914	1.43829	0.0131055	0.0399198
mevalonate	Mevalonate Metabolism	Lipid	30	3.75075	0.0133435	0.040541
1,2,3-benzenetriol sulfate (2)	Chemical	Xenobiotics	100006374	45.4836	0.0133575	0.0404805
N2,N2-dimethylguanine	Purine Metabolism, Guanine containing	Nucleotide	100001853	4.69073	0.0133811	0.0404491
4-ethylcatechol sulfate	Benzoate Metabolism	Xenobiotics	100020536	9.32809	0.0133865	0.0403628
glutamine conjugate of C8H12O4 (1)*	Partially Characterized Molecules	Partially Characterized Molecules	100020265	2.11034	0.0134962	0.0405907
X-12111			999912111	1.53998	0.0136686	0.0410057
X-11795			999911795	2.53868	0.0138147	0.0413398
methylurea	Urea cycle; Arginine and Proline Metabolism	Amino Acid	100001401	1.75722	0.0138208	0.0412547
alpha-tocopherol	Tocopherol Metabolism	Cofactors and Vitamins	1105	5.30803	0.013846	0.0412265
glycine	Glycine, Serine and Threonine Metabolism	Amino Acid	340	1.63498	0.0139049	0.0412987
glucarate (saccharate)	Ascorbate and Aldarate Metabolism	Cofactors and Vitamins	1020	0.218857	0.0141302	0.0418634
gamma-CEHC sulfate	Tocopherol Metabolism	Cofactors and Vitamins	100020480	0.453116	0.014545	0.0429854
glucuronide of C10H14O2 (4)*	Partially Characterized Molecules	Partially Characterized Molecules	100020022	0.555768	0.0148329	0.0437276
4-hydroxybenzoate	Benzoate Metabolism	Xenobiotics	100000862	2.81938	0.0156808	0.0461132
S-adenosylhomocysteine (SAH)	Methionine, Cysteine, SAM and Taurine Metabolism	Amino Acid	197	0.401219	0.0160549	0.047097
X-13553			999913553	1.41979	0.0162048	0.0474198
N-methylalanine	Alanine and Aspartate Metabolism	Amino Acid	100001823	2.50199	0.0164841	0.048119
X-12844			999912844	2.90518	0.0166918	0.0486062
3-hydroxyanthranilate	Tryptophan Metabolism	Amino Acid	243	3.22126	0.0168671	0.0489969
X-25838			999925838	3.87475	0.0168767	0.0489055
X-23424			999923424	0.358226	0.0169485	0.0489943
2-oxindole-3-acetate	Food Component/Plant	Xenobiotics	100003109	1.51702	0.0169669	0.0489288
5,6-dihydrouridine	Pyrimidine Metabolism, Uracil containing	Nucleotide	100001425	1.36344	0.0172011	0.0494845
4-hydroxyglutamate	Glutamate Metabolism	Amino Acid	100002544	2.1819	0.0173545	0.0498053
N-acetyl-2-aminoadipate	Lysine Metabolism	Amino Acid	100021760	1.40277	0.0173889	0.049784
X-21830			999921830	1.58695	0.0175052	0.0499969
4-vinylphenol sulfate	Benzoate Metabolism	Xenobiotics	100001755	2.17417	0.017618	0.0501986
11-ketoetiocholanolone glucuronide	Androgenic Steroids	Lipid	100005402	2.8155	0.0177393	0.0504237
3-methoxy-4-hydroxyphenylglycol	Tyrosine Metabolism	Amino Acid	100002161	1.57099	0.0181837	0.0515639
X-24356			999924356	2.59263	0.0181867	0.0514498
N-acetyl-cadaverine	Lysine Metabolism	Amino Acid	100002249	5.66319	0.0185235	0.0522784
indolin-2-one	Food Component/Plant	Xenobiotics	100004318	4.25071	0.0187927	0.0529127
indoxyl glucuronide	Tryptophan Metabolism	Amino Acid	100008931	4.28318	0.019226	0.0540052
X-12101			999912101	2.7191	0.0194598	0.0545332
phosphate	Oxidative Phosphorylation	Energy	461	1.83678	0.0195676	0.0547065
N-acetylhomocitrulline	Urea cycle; Arginine and Proline Metabolism	Amino Acid	100020513	1.74235	0.0201254	0.0561342
X-12726			999912726	1.89559	0.0204229	0.0568311
phenylacetylcarnitine	Acetylated Peptides	Peptide	100006108	0.105949	0.0207945	0.0577302
3-heptenoylglutamine	Fatty Acid Metabolism (Acyl Glutamine)	Lipid	100019813	2.27354	0.0208242	0.0576781
X-24470			999924470	3.08813	0.020897	0.0577455
5-oxoproline	Glutathione Metabolism	Amino Acid	1021	1.47413	0.0210145	0.0579357
symmetric dimethylarginine (SDMA)	Urea cycle; Arginine and Proline Metabolism	Amino Acid	100001410	1.71641	0.021109	0.0580621
X-23438			999923438	1.4629	0.0212662	0.0583595
N6-succinyladenosine	Purine Metabolism, Adenine containing	Nucleotide	100001664	1.64568	0.0213911	0.0585672
N-acetylglutamine	Glutamate Metabolism	Amino Acid	100001253	1.73416	0.0215916	0.0589808
X-24456			999924456	0.328393	0.0217549	0.0592909
biotin	Biotin Metabolism	Cofactors and Vitamins	251	8.06776	0.0219907	0.0597967
glucuronide of C10H18O2 (10)*	Partially Characterized Molecules	Partially Characterized Molecules	100020017	4.63988	0.0220457	0.0598096
11-dehydrocorticosterone sulfate	Corticosteroids	Lipid	100020563	3.12388	0.0223914	0.0606096
phenylacetylalanine	Acetylated Peptides	Peptide	100009240	1.51928	0.0228038	0.0615859
glutamine conjugate of C6H10O2 (1)*	Partially Characterized Molecules	Partially Characterized Molecules	100020261	1.98991	0.0228794	0.0616503
X-25457			999925457	1.97964	0.0229026	0.0615733
3-methylglutarate/2-methylglutarate	Fatty Acid, Dicarboxylate	Lipid	100010834	1.6462	0.0230166	0.0617405
X-24418			999924418	2.0914	0.0230974	0.061818
X-24346			999924346	5.18767	0.0232145	0.0619921
N-acetylserine	Glycine, Serine and Threonine Metabolism	Amino Acid	100001851	1.59858	0.0233621	0.0622467
glycerophosphoglycerol	Glycerolipid Metabolism	Lipid	100001619	1.57866	0.0239532	0.0636791
phosphoethanolamine	Phospholipid Metabolism	Lipid	1026	2.3172	0.0239864	0.0636255
5-hydroxypicolinic acid	Tryptophan Metabolism	Amino Acid	100021277	1.54363	0.0239985	0.063516
carboxymethylarginine	Urea cycle; Arginine and Proline Metabolism	Amino Acid	100021052	2.50993	0.0243327	0.0642577
cysteine	Methionine, Cysteine, SAM and Taurine Metabolism	Amino Acid	800	0.339727	0.0244812	0.0645069
X-15461			999915461	4.22125	0.024706	0.0649556
2,8-quinolinediol	Food Component/Plant	Xenobiotics	100004206	6.64377	0.0249559	0.065468
N2,N6-diacetyllysine	Lysine Metabolism	Amino Acid	100006124	1.66677	0.0251628	0.0658657
isoleucylglycine	Dipeptide	Peptide	100003169	2.21657	0.0252197	0.0658698
pantoate	Pantothenate and CoA Metabolism	Cofactors and Vitamins	100002613	1.8956	0.0254807	0.066406
anthranilate	Tryptophan Metabolism	Amino Acid	1258	2.17042	0.0254819	0.066264
2-methylmalonylcarnitine (C4-DC)	Fatty Acid Metabolism (also BCAA Metabolism)	Lipid	100001596	1.72717	0.0257916	0.0669233
orotate	Pyrimidine Metabolism, Orotate containing	Nucleotide	445	1.93815	0.0263856	0.0683159
2-methoxyresorcinol sulfate	Chemical	Xenobiotics	100006184	7.71042	0.0266901	0.0689543
X-23680			999923680	0.574072	0.0269477	0.069469
gentisate	Tyrosine Metabolism	Amino Acid	100000447	2.99821	0.02715	0.0698394
indole-3-carboxylate	Tryptophan Metabolism	Amino Acid	100002185	4.62997	0.0273495	0.0702009
2-oxoarginine*	Urea cycle; Arginine and Proline Metabolism	Amino Acid	100002784	0.449757	0.0277835	0.0711616
N-acetylcysteine	Methionine, Cysteine, SAM and Taurine Metabolism	Amino Acid	1107	0.448206	0.0279305	0.0713847
glycolate (hydroxyacetate)	Chemical	Xenobiotics	203	2.54047	0.0282359	0.0720107
X-12117			999912117	1.49958	0.0288239	0.073353
thymine	Pyrimidine Metabolism, Thymine containing	Nucleotide	882	3.20852	0.0288558	0.0732777
5-hydroxymethyl-2-furoylcarnitine*	Food Component/Plant	Xenobiotics	100021012	0.616164	0.028879	0.0731806
trans-aconitate	TCA Cycle	Energy	100001043	3.24065	0.0294248	0.0744054
propionylcarnitine (C3)	Fatty Acid Metabolism (also BCAA Metabolism)	Lipid	100001162	0.360397	0.029434	0.074271
phenylalanylglycine	Dipeptide	Peptide	100003588	1.81308	0.0297663	0.0749506
X-24354			999924354	0.496721	0.0300827	0.0755875
3-hydroxyphenylacetoylglutamine	Acetylated Peptides	Peptide	100019831	1.34938	0.0302495	0.0758467
3-methylcytidine	Pyrimidine Metabolism, Cytidine containing	Nucleotide	100001466	1.40862	0.0306333	0.0766477
glycoursodeoxycholate	Secondary Bile Acid Metabolism	Lipid	100002911	5.90663	0.0306948	0.0766404
levulinate (4-oxovalerate)	Food Component/Plant	Xenobiotics	100000765	2.09405	0.0310837	0.0774492
beta-alanine	Pyrimidine Metabolism, Uracil containing	Nucleotide	244	1.63421	0.031239	0.0776736
tetrahydrocortisone	Corticosteroids	Lipid	100002403	3.39985	0.0312882	0.0776338
X-25432			999925432	0.39444	0.0319579	0.0791307
2-methylbutyrylcarnitine (C5)	Leucine, Isoleucine and Valine Metabolism	Amino Acid	100001509	0.468495	0.0321857	0.0795294
fumarate	TCA Cycle	Energy	330	1.95612	0.0321883	0.0793712
3-hydroxyoctanoate	Fatty Acid, Monohydroxy	Lipid	100000773	2.00236	0.0327968	0.0807045
glycine conjugate of C10H14O2 (2)*	Partially Characterized Molecules	Partially Characterized Molecules	100020266	1.97134	0.0335434	0.0823714
X-13728			999913728	3.16051	0.0335856	0.0823055
4-imidazoleacetate	Histidine Metabolism	Amino Acid	100001207	1.61233	0.0338666	0.0828236
3-hydroxystachydrine*	Food Component/Plant	Xenobiotics	100020203	2.59104	0.0345508	0.0843237
decanoylcarnitine (C10)	Fatty Acid Metabolism (Acyl Carnitine, Medium Chain)	Lipid	100001251	4.89418	0.0348934	0.0849857
N-acetylarginine	Urea cycle; Arginine and Proline Metabolism	Amino Acid	100001266	0.686004	0.0348975	0.0848224
1,3,7-trimethylurate	Xanthine Metabolism	Xenobiotics	100001397	1.62207	0.0350593	0.0850421
X-12729			999912729	2.40358	0.0351079	0.0849869
m-tyramine sulfate	Tyrosine Metabolism	Amino Acid	100006104	1.87362	0.0351096	0.0848186
2S,3R-dihydroxybutyrate	Fatty Acid, Dihydroxy	Lipid	100002284	1.36762	0.0357593	0.0862133
N-acetylglycine	Glycine, Serine and Threonine Metabolism	Amino Acid	100001006	1.73462	0.0359144	0.0864121
11beta-hydroxyetiocholanolone glucuronide*	Androgenic Steroids	Lipid	100020542	3.58482	0.0359643	0.0863579
3-hydroxybutyrate (BHBA)	Ketone Bodies	Lipid	254	2.98416	0.0360186	0.0863142
androstenediol (3beta,17beta) disulfate (1)	Androgenic Steroids	Lipid	100001992	1.64957	0.0363493	0.0869316
X-17674			999917674	1.62536	0.0364093	0.0869007
inosine	Purine Metabolism, (Hypo)Xanthine/Inosine containing	Nucleotide	361	1.68938	0.0364177	0.0867471
vanillate glucuronide	Food Component/Plant	Xenobiotics	100020606	1.8588	0.0380062	0.09035
theobromine	Xanthine Metabolism	Xenobiotics	100000445	2.70245	0.038311	0.0908933
X-24363			999924363	0.532829	0.0387626	0.0917818
N-acetyl-aspartyl-glutamate (NAAG)	Glutamate Metabolism	Amino Acid	100001612	1.46377	0.038826	0.0917495
taurocholate	Primary Bile Acid Metabolism	Lipid	1648	1.66435	0.0388372	0.0915942
5-hydroxyhexanoate	Fatty Acid, Monohydroxy	Lipid	100001148	1.72874	0.038984	0.0917588
X-24462			999924462	2.28442	0.0397118	0.0932875
5-aminovalerate	Lysine Metabolism	Amino Acid	100000454	2.38787	0.0400402	0.0938738
3-methylglutarylcarnitine (2)	Leucine, Isoleucine and Valine Metabolism	Amino Acid	100005850	1.93558	0.0404074	0.0945485
alpha-CMBHC glucuronide	Tocopherol Metabolism	Cofactors and Vitamins	100005977	3.15592	0.0406329	0.0948899
paraxanthine	Xanthine Metabolism	Xenobiotics	100000453	2.03682	0.0409889	0.0955338
trans-3,4-methyleneheptanoylglycine	Fatty Acid Metabolism (Acyl Glycine)	Lipid	100010861	1.74984	0.0411538	0.0957308
3-hydroxyindolin-2-one sulfate	Food Component/Plant	Xenobiotics	100006103	3.22471	0.0415385	0.0964372
2-hydroxysebacate	Fatty Acid, Dicarboxylate	Lipid	100020378	2.32726	0.0416423	0.0964903
X-12745			999912745	2.5204	0.0422158	0.0976291
1-methyl-4-imidazoleacetate	Histidine Metabolism	Amino Acid	100001208	1.42014	0.0423436	0.097735
21-hydroxypregnenolone disulfate	Pregnenolone Steroids	Lipid	100001999	1.44349	0.0423464	0.0975524
X-18838			999918838	2.3317	0.0424299	0.097556
5-aminolevulinate	Hemoglobin and Porphyrin Metabolism	Cofactors and Vitamins	1306	1.38443	0.0425547	0.0976545
3-indoxyl sulfate	Tryptophan Metabolism	Amino Acid	100000467	4.17163	0.0426005	0.0975715
vanillactate	Tyrosine Metabolism	Amino Acid	100006129	1.99328	0.0428884	0.0980423
4-hydroxyphenylacetate	Phenylalanine Metabolism	Amino Acid	144	1.99289	0.0429415	0.0979758
tyramine O-sulfate	Tyrosine Metabolism	Amino Acid	100006092	5.42889	0.0435685	0.0992163
3-hydroxypropanoate	Fatty Acid, Monohydroxy	Lipid	115	2.20506	0.0442895	0.100666
X-23672			999923672	1.62418	0.0443268	0.100559
X-23665			999923665	2.01078	0.0444653	0.100681
X-12822			999912822	1.39468	0.0445905	0.100773
anserine	Histidine Metabolism	Amino Acid	100000044	1.68078	0.0449562	0.101407
X-17328			999917328	1.73001	0.0449912	0.101294
N6-methyladenosine	Purine Metabolism, Adenine containing	Nucleotide	213	3.27061	0.045337	0.10188
palmitoyl sphingomyelin (d18:1/16:0)	Sphingomyelins	Lipid	100002107	2.02057	0.0460609	0.103312
X-11843			999911843	0.504633	0.0466121	0.104352
ethanolamine	Phospholipid Metabolism	Lipid	420	6.48617	0.0468285	0.104639
cis-3,4-methyleneheptanoylcarnitine	Fatty Acid Metabolism (Acyl Carnitine, Medium Chain)	Lipid	100021728	0.397227	0.0468492	0.104489
X-21410			999921410	2.07512	0.0469157	0.104442
diacetylspermidine*	Polyamine Metabolism	Amino Acid	100020242	1.70146	0.0471835	0.104843
X-12708			999912708	1.39685	0.0479576	0.106364
1-methylguanidine	Guanidino and Acetamido Metabolism	Amino Acid	100000715	1.44795	0.0488528	0.108148
X-25406			999925406	1.39437	0.0489615	0.108188
benzoate	Benzoate Metabolism	Xenobiotics	100000008	8.93365	0.0490633	0.108212
glutamine	Glutamate Metabolism	Amino Acid	563	1.89837	0.0522787	0.115091
glycerol 3-phosphate	Glycerolipid Metabolism	Lipid	100000258	1.60059	0.0529049	0.116254
N-acetylglucosaminylasparagine	Aminosugar Metabolism	Carbohydrate	1215	1.40352	0.0531935	0.116673
androstenediol (3beta,17beta) disulfate (2)	Androgenic Steroids	Lipid	100001994	1.39533	0.0532463	0.116574
dehydroandrosterone glucuronide	Androgenic Steroids	Lipid	100021354	3.72438	0.053519	0.116956
X-21796			999921796	1.70219	0.0538084	0.117373
pregnenediol disulfate (C21H34O8S2)*	Pregnenolone Steroids	Lipid	100001993	1.74531	0.0538247	0.117194
X-25464			999925464	0.459332	0.054468	0.118379
2R,3R-dihydroxybutyrate	Fatty Acid, Dihydroxy	Lipid	100002367	1.41016	0.0546024	0.118454
pregnenetriol sulfate*	Pregnenolone Steroids	Lipid	100021103	1.64645	0.0546435	0.118328
X-12097			999912097	1.51641	0.0550003	0.118884
1,2,3-benzenetriol sulfate (1)	Chemical	Xenobiotics	100006373	4.42443	0.0560868	0.121013
guanidinosuccinate	Guanidino and Acetamido Metabolism	Amino Acid	100001212	1.9409	0.0565741	0.121844
choline phosphate	Phospholipid Metabolism	Lipid	267	1.604	0.0583088	0.125353
X-12680			999912680	1.86553	0.0587081	0.125984
3-hydroxyoctanoylcarnitine (1)	Fatty Acid Metabolism (Acyl Carnitine, Hydroxy)	Lipid	100021990	1.87649	0.0596717	0.127822
X-24432			999924432	2.93953	0.0601356	0.128584
2-isopropylmalate	Food Component/Plant	Xenobiotics	100000409	2.97264	0.0611903	0.130605
X-11787			999911787	1.54	0.0619735	0.13204
5-hydroxyindole glucuronide	Tryptophan Metabolism	Amino Acid	100020511	3.63235	0.0628094	0.133582
delta-CEHC glucuronide	Tocopherol Metabolism	Cofactors and Vitamins	100020483	0.616049	0.063723	0.135284
5-hydroxyindole sulfate	Tryptophan Metabolism	Amino Acid	100009042	2.92894	0.0645403	0.136775
X-25528			999925528	3.58628	0.0653029	0.138145
3-methyl catechol sulfate (1)	Benzoate Metabolism	Xenobiotics	100004112	1.8193	0.0658613	0.13908
glucuronide of C10H18O2 (11)*	Partially Characterized Molecules	Partially Characterized Molecules	100020018	1.52379	0.0667794	0.140769
6-sialyl-N-acetyllactosamine	Aminosugar Metabolism	Carbohydrate	100003259	1.46103	0.0672427	0.141495
X-13729			999913729	2.63973	0.0673438	0.141458
tauroursodeoxycholate	Secondary Bile Acid Metabolism	Lipid	100002912	3.72411	0.0676766	0.141906
X-25802			999925802	1.80772	0.0680818	0.142505
2-aminophenol sulfate	Food Component/Plant	Xenobiotics	100004322	1.48682	0.0681531	0.142404
carnosine	Histidine Metabolism	Amino Acid	249	1.47023	0.0704441	0.146933
cysteine sulfinic acid	Methionine, Cysteine, SAM and Taurine Metabolism	Amino Acid	100002113	0.502559	0.0704987	0.14679
glucuronide of C19H28O4 (2)*	Partially Characterized Molecules	Partially Characterized Molecules	100019988	2.28868	0.0705839	0.146711
fentanyl	Drug - Analgesics, Anesthetics	Xenobiotics	100006744	0.27485	0.071366	0.148078
lactate	Glycolysis, Gluconeogenesis, and Pyruvate Metabolism	Carbohydrate	482	1.81733	0.071715	0.148544
1,3-dimethylurate	Xanthine Metabolism	Xenobiotics	100001106	3.50411	0.0722983	0.149492
riboflavin (Vitamin B2)	Riboflavin Metabolism	Cofactors and Vitamins	500	1.55964	0.0732451	0.151187
dodecenedioate (C12:1-DC)*	Fatty Acid, Dicarboxylate	Lipid	100019972	3.58909	0.0738596	0.152192
eugenol sulfate	Food Component/Plant	Xenobiotics	100006171	9.42206	0.0740305	0.15228
3-ureidoisobutyrate	Pyrimidine Metabolism, Uracil containing	Nucleotide	100001531	1.51652	0.0749075	0.153819
X-24417			999924417	2.54553	0.0749732	0.153689
carnitine	Carnitine Metabolism	Lipid	100000007	0.561692	0.0752974	0.154088
nicotinate	Nicotinate and Nicotinamide Metabolism	Cofactors and Vitamins	567	8.64019	0.0753117	0.153853
1-palmitoyl-GPC (16:0)	Lysophospholipid	Lipid	100001263	12.8671	0.0756738	0.154328
X-18945			999918945	3.52094	0.0757177	0.154154
androstenediol (3alpha, 17alpha) monosulfate (2)	Androgenic Steroids	Lipid	100002026	1.59736	0.0776724	0.157863
2,3-dihydroxyisovalerate	Food Component/Plant	Xenobiotics	100002417	3.30075	0.0784783	0.159229
3-methyl-2-oxovalerate	Leucine, Isoleucine and Valine Metabolism	Amino Acid	100000036	1.52962	0.0794401	0.160907
N,N,N-trimethyl-5-aminovalerate	Lysine Metabolism	Amino Acid	100015962	1.74414	0.0796356	0.161029
2-methoxyhydroquinone sulfate (1)	Benzoate Metabolism	Xenobiotics	100021839	1.41148	0.0814051	0.164328
formiminoglutamate	Histidine Metabolism	Amino Acid	100002500	0.704016	0.0814213	0.164083
X-25959			999925959	2.75835	0.0817024	0.164371
pyridoxine (Vitamin B6)	Vitamin B6 Metabolism	Cofactors and Vitamins	936	2.09666	0.0820502	0.164792
N-acetylalanine	Alanine and Aspartate Metabolism	Amino Acid	1110	1.64727	0.082136	0.164687
orotidine	Pyrimidine Metabolism, Orotate containing	Nucleotide	100001416	1.29884	0.0822612	0.164661
o-cresol sulfate	Benzoate Metabolism	Xenobiotics	100001806	0.674542	0.0825758	0.165013
5-(galactosylhydroxy)-L-lysine	Lysine Metabolism	Amino Acid	100002462	1.46362	0.0826089	0.164803
X-23423			999923423	1.66009	0.0827657	0.164839
glycohyocholate	Secondary Bile Acid Metabolism	Lipid	100004083	4.41718	0.0833471	0.16572
(N(1) + N(8))-acetylspermidine	Polyamine Metabolism	Amino Acid	100016038	1.34185	0.0841408	0.167019
saccharin	Food Component/Plant	Xenobiotics	100000870	249.309	0.0843442	0.167145
X-17842			999917842	2.86624	0.0852386	0.168637
X-21470			999921470	1.49497	0.0857198	0.169307
X-24519			999924519	2.47709	0.0860032	0.169586
cyclo(leu-pro)	Dipeptide	Peptide	100001925	4.22623	0.0863739	0.170035
X-25916			999925916	0.492146	0.0870381	0.17106
cortisol 21-sulfate	Corticosteroids	Lipid	100021048	1.95219	0.0872119	0.171119
X-17676			999917676	1.2867	0.0880008	0.172383
salicylate	Drug - Topical Agents	Xenobiotics	501	2.41599	0.0882657	0.172618
3'-sialyllactose	Disaccharides and Oligosaccharides	Carbohydrate	100003408	1.57468	0.0888738	0.173523
uridine	Pyrimidine Metabolism, Uracil containing	Nucleotide	535	2.22968	0.0890585	0.173599
X-24359			999924359	1.52328	0.0900456	0.175236
X-24228			999924228	1.35555	0.0910933	0.176985
2-methylhexanoylcarnitine	Fatty Acid Metabolism (Acyl Carnitine, Medium Chain)	Lipid	100016060	0.538191	0.0916253	0.177729
N-carbamoylalanine	Alanine and Aspartate Metabolism	Amino Acid	100006369	1.51308	0.0921206	0.178399
hydantoin-5-propionate	Histidine Metabolism	Amino Acid	100002514	0.66855	0.092849	0.179518
cortolone glucuronide (2)	Corticosteroids	Lipid	100015973	1.83477	0.093079	0.179671
gamma-CEHC glucuronide*	Tocopherol Metabolism	Cofactors and Vitamins	100004243	0.686739	0.0936613	0.180503
X-13431			999913431	0.658556	0.0939007	0.180672
X-24415			999924415	0.638759	0.0939167	0.180411
X-13698			999913698	0.662604	0.0939419	0.180169
lignoceroyl sphingomyelin (d18:1/24:0)	Sphingomyelins	Lipid	100006298	2.39215	0.0943042	0.180573
behenoyl sphingomyelin (d18:1/22:0)*	Sphingomyelins	Lipid	100006294	2.46939	0.0945659	0.180783
X-24543			999924543	5.63485	0.0947746	0.180892
cortisol 21-glucuronide	Corticosteroids	Lipid	100005434	1.67222	0.0947972	0.180646
N2,N5-diacetylornithine	Urea cycle; Arginine and Proline Metabolism	Amino Acid	100004575	1.87313	0.0949396	0.180628
X-25785			999925785	3.74663	0.0952179	0.180869
pregnanediol-3-glucuronide	Progestin Steroids	Lipid	100003470	2.1061	0.095232	0.180607
X-24728			999924728	0.785582	0.0954444	0.180722
3-methoxycatechol sulfate (2)	Benzoate Metabolism	Xenobiotics	100006376	1.40677	0.0959583	0.181407
pipecolate	Lysine Metabolism	Amino Acid	1025	1.41871	0.0962062	0.181587
tryptophan	Tryptophan Metabolism	Amino Acid	565	1.7033	0.0963146	0.181504
N-acetyl-2-aminooctanoate*	Fatty Acid, Amino	Lipid	100020204	1.61218	0.0969099	0.182338
X-23656			999923656	0.671853	0.0970833	0.182376
N-(2-furoyl)glycine	Food Component/Plant	Xenobiotics	100001086	1.5765	0.097908	0.183635
creatine	Creatine Metabolism	Amino Acid	1221	1.58658	0.0986817	0.184795
X-24330			999924330	1.59052	0.0990468	0.185188
N-methylhydantoin	Creatine Metabolism	Amino Acid	100002557	2.62453	0.0997798	0.186266
chlorothiazide	Drug - Cardiovascular	Xenobiotics	100021791	2.68326	0.101021	0.188289
X-10458			999910458	1.4228	0.101457	0.188806
tyramine	Tyrosine Metabolism	Amino Acid	1133	5.24817	0.101762	0.189078
X-25594			999925594	3.10553	0.101779	0.188814
isobutyrylcarnitine (C4)	Leucine, Isoleucine and Valine Metabolism	Amino Acid	100001055	0.541658	0.101949	0.188836
homovanillate (HVA)	Tyrosine Metabolism	Amino Acid	117	1.44383	0.102953	0.190398
2,3-dihydroxy-3-methylvalerate	Leucine, Isoleucine and Valine Metabolism	Amino Acid	100002634	3.95418	0.10372	0.19152
N-methyl-GABA	Glutamate Metabolism	Amino Acid	100003152	1.43494	0.104439	0.192548
X-12262			999912262	1.50848	0.104795	0.192907
valine	Leucine, Isoleucine and Valine Metabolism	Amino Acid	566	1.74222	0.106424	0.195604
leucine	Leucine, Isoleucine and Valine Metabolism	Amino Acid	397	1.50787	0.107	0.19636
glycocholate sulfate	Primary Bile Acid Metabolism	Lipid	100006639	24.1962	0.107969	0.197833
3-methoxytyramine sulfate	Tyrosine Metabolism	Amino Acid	100004634	0.392267	0.108175	0.197906
dimethylmalonic acid	Fatty Acid, Dicarboxylate	Lipid	100004251	0.5573	0.110459	0.201774
X-12124			999912124	0.606598	0.110871	0.202217
phenylacetylglutamate	Acetylated Peptides	Peptide	100009045	1.30127	0.110989	0.202122
4'-hydroxypropiophenone sulfate	Chemical	Xenobiotics	100006269	2.77294	0.111552	0.202838
caffeate	Food Component/Plant	Xenobiotics	100000914	0.253549	0.111883	0.203128
5-acetylamino-6-formylamino-3-methyluracil	Xanthine Metabolism	Xenobiotics	100001402	2.76101	0.111889	0.202831
11-ketoetiocholanolone sulfate	Androgenic Steroids	Lipid	100002125	0.488051	0.111903	0.202548
5-hydroxy-2-methylpyridine sulfate	Chemical	Xenobiotics	100020973	8.1349	0.112154	0.202693
N-methylleucine	Leucine, Isoleucine and Valine Metabolism	Amino Acid	100001581	1.88692	0.112375	0.202786
X-24334			999924334	1.29389	0.114242	0.205842
X-12216			999912216	2.39905	0.115992	0.20868
picolinate	Tryptophan Metabolism	Amino Acid	1022	1.98775	0.116633	0.209516
gamma-glutamylisoleucine*	Gamma-glutamyl Amino Acid	Peptide	100001485	1.23745	0.11698	0.209824
X-25853			999925853	1.73946	0.116998	0.209541
xanthopterin	Pterin Metabolism	Cofactors and Vitamins	100006338	1.58648	0.117542	0.2102
X-15136			999915136	1.46723	0.117811	0.210364
pterin	Pterin Metabolism	Cofactors and Vitamins	100004216	1.44818	0.117928	0.210258
glycerophosphoinositol*	Phospholipid Metabolism	Lipid	100001621	1.59703	0.118659	0.211244
3-hydroxykynurenine	Tryptophan Metabolism	Amino Acid	100000986	2.44287	0.118663	0.210938
4-methyl-2-oxopentanoate	Leucine, Isoleucine and Valine Metabolism	Amino Acid	100000551	1.91431	0.119731	0.212519
N-acetylcarnosine	Histidine Metabolism	Amino Acid	100004046	1.32918	0.119869	0.212447
4-hydroxyphenylacetoylcarnitine	Tyrosine Metabolism	Amino Acid	100006619	2.20508	0.120491	0.213232
X-24762			999924762	3.56513	0.120691	0.213269
X-17357			999917357	1.86412	0.12072	0.213004
X-17010			999917010	5.15406	0.123101	0.216884
N-acetylvaline	Leucine, Isoleucine and Valine Metabolism	Amino Acid	1084	1.24428	0.123452	0.217181
3-fucosyllactose	Disaccharides and Oligosaccharides	Carbohydrate	100002931	2.11885	0.123829	0.217522
glucuronide of C12H20O3 (5)*	Partially Characterized Molecules	Partially Characterized Molecules	100020095	2.85536	0.124333	0.218086
X-25527			999925527	1.67609	0.125288	0.219438
3-methoxytyramine	Tyrosine Metabolism	Amino Acid	118	1.36595	0.126054	0.220455
glycochenodeoxycholate	Primary Bile Acid Metabolism	Lipid	1628	4.85525	0.126698	0.221257
ornithine	Urea cycle; Arginine and Proline Metabolism	Amino Acid	444	0.676129	0.127985	0.223177
alpha-CEHC glucuronide*	Tocopherol Metabolism	Cofactors and Vitamins	100003101	1.59163	0.129646	0.225744
6-phosphogluconate	Pentose Phosphate Pathway	Carbohydrate	100000341	0.17247	0.129687	0.225484
pivaloylcarnitine (C5)	Drug - Topical Agents	Xenobiotics	100001589	2.02644	0.131028	0.227484
X-25433			999925433	1.81044	0.13112	0.227313
N1-methyladenosine	Purine Metabolism, Adenine containing	Nucleotide	1242	1.25436	0.131433	0.227525
11beta-hydroxyandrosterone glucuronide	Androgenic Steroids	Lipid	100020541	3.02355	0.131586	0.227458
epiandrosterone glucuronide	Androgenic Steroids	Lipid	100005400	5.11203	0.132115	0.228042
carnitine of C10H14O2 (5)*	Partially Characterized Molecules	Partially Characterized Molecules	100021678	0.517333	0.13213	0.227737
androsterone glucuronide	Androgenic Steroids	Lipid	100002761	4.04999	0.132208	0.227543
isoleucine	Leucine, Isoleucine and Valine Metabolism	Amino Acid	376	1.45468	0.132363	0.227481
S(2-carboxyethyl)mercapturic acid	Chemical	Xenobiotics	100004569	0.680573	0.132714	0.227755
X-12713			999912713	1.24542	0.133984	0.229604
X-25219			999925219	1.58475	0.134655	0.230423
alpha-hydroxyisovalerate	Leucine, Isoleucine and Valine Metabolism	Amino Acid	100001300	2.10196	0.135929	0.232268
N-acetylhistidine	Histidine Metabolism	Amino Acid	100001293	1.22671	0.136037	0.232121
X-22148			999922148	0.572938	0.136222	0.232103
quinolinate	Nicotinate and Nicotinamide Metabolism	Cofactors and Vitamins	182	1.45292	0.136455	0.232168
X-24494			999924494	2.27277	0.137921	0.234328
X-10445			999910445	1.55184	0.139412	0.236524
histidine betaine (hercynine)*	Food Component/Plant	Xenobiotics	100004059	2.37511	0.140543	0.238103
acetylagmatine	Polyamine Metabolism	Amino Acid	100005945	3.19972	0.141249	0.23896
guanine	Purine Metabolism, Guanine containing	Nucleotide	172	2.69472	0.141412	0.238896
1-methylnicotinamide	Nicotinate and Nicotinamide Metabolism	Cofactors and Vitamins	55	1.21325	0.144018	0.242955
X-12199			999912199	0.666471	0.146743	0.247201
glycylleucine	Dipeptide	Peptide	100001258	1.86644	0.14723	0.24767
etiocholanolone glucuronide	Androgenic Steroids	Lipid	100005403	6.59124	0.147321	0.247474
N,N-dimethylalanine	Alanine and Aspartate Metabolism	Amino Acid	100020371	1.52363	0.147518	0.247457
4-ethylphenylsulfate	Benzoate Metabolism	Xenobiotics	100001756	2.40929	0.147953	0.247837
biopterin	Tetrahydrobiopterin Metabolism	Cofactors and Vitamins	1548	0.790305	0.152011	0.254277
isovalerylglycine	Leucine, Isoleucine and Valine Metabolism	Amino Acid	100001452	0.668368	0.152569	0.254852
mandelate	Benzoate Metabolism	Xenobiotics	100000710	0.343108	0.153835	0.256607
mannose	Fructose, Mannose and Galactose Metabolism	Carbohydrate	803	1.35658	0.154792	0.257842
1,3-propanediol	Chemical	Xenobiotics	100001175	15.0087	0.155098	0.257991
X-24670			999924670	4.69386	0.155828	0.258844
alpha-hydroxyisocaproate	Leucine, Isoleucine and Valine Metabolism	Amino Acid	100000706	3.28444	0.156733	0.259984
citraconate/glutaconate	TCA Cycle	Energy	100006438	1.55213	0.157411	0.260747
X-18240			999918240	1.38955	0.157832	0.26108
X-23647			999923647	1.56404	0.158086	0.261138
sucrose	Disaccharides and Oligosaccharides	Carbohydrate	935	2.43618	0.15896	0.262218
X-24403			999924403	0.688997	0.159648	0.262989
2-hydroxyoctanoate	Fatty Acid, Monohydroxy	Lipid	100000743	1.79366	0.160333	0.263753
acetylcarnitine (C2)	Fatty Acid Metabolism (Acyl Carnitine, Short Chain)	Lipid	100000802	0.564545	0.160368	0.263447
X-21788			999921788	1.31406	0.160781	0.263761
X-24669			999924669	2.48568	0.161495	0.264567
N-formylphenylalanine	Tyrosine Metabolism	Amino Acid	100006056	0.743134	0.163829	0.268023
monobutyl phthalate acyl-beta-D-glucuronide	Chemical	Xenobiotics	100021961	0.240754	0.165451	0.270305
cholate	Primary Bile Acid Metabolism	Lipid	136	3.00715	0.166392	0.27147
N-acetyl-beta-alanine	Pyrimidine Metabolism, Uracil containing	Nucleotide	100002102	1.35136	0.167343	0.272647
X-26054			999926054	1.49226	0.168112	0.273527
argininosuccinate	Urea cycle; Arginine and Proline Metabolism	Amino Acid	232	1.56578	0.168874	0.274392
X-18935			999918935	2.3542	0.169274	0.274666
cytosine	Pyrimidine Metabolism, Cytidine containing	Nucleotide	881	1.98267	0.170015	0.275493
salicyluric glucuronide*	Drug - Analgesics, Anesthetics	Xenobiotics	100001332	1.84294	0.170792	0.276376
3-hydroxyphenylacetoylcarnitine	Tyrosine Metabolism	Amino Acid	100006618	0.501145	0.173046	0.279644
allo-threonine	Glycine, Serine and Threonine Metabolism	Amino Acid	100000272	0.804653	0.179834	0.290221
X-24408			999924408	0.801852	0.181532	0.292564
hydroquinone sulfate	Drug - Topical Agents	Xenobiotics	100001604	2.74545	0.181735	0.292496
4-methylbenzenesulfonate	Chemical	Xenobiotics	100002390	2.42171	0.182459	0.293264
alpha-ketoglutarate	TCA Cycle	Energy	93	2.5657	0.182936	0.293634
tetrahydrocortisol sulfate (2)	Corticosteroids	Lipid	100020849	2.12457	0.183001	0.293344
X-13695			999913695	1.25269	0.183571	0.293862
phenethylamine	Phenylalanine Metabolism	Amino Acid	1207	2.21819	0.1855	0.296551
X-18347			999918347	1.51473	0.186393	0.297579
fructose	Fructose, Mannose and Galactose Metabolism	Carbohydrate	878	1.68564	0.187621	0.299139
agmatine	Polyamine Metabolism	Amino Acid	100000103	5.07117	0.188274	0.299779
3-hydroxyindolin-2-one	Food Component/Plant	Xenobiotics	100003823	1.77808	0.189846	0.301877
isovalerylglutamine	Leucine, Isoleucine and Valine Metabolism	Amino Acid	100010859	0.709889	0.189911	0.301579
phenol glucuronide	Tyrosine Metabolism	Amino Acid	100006679	3.65441	0.190672	0.302384
taurochenodeoxycholate	Primary Bile Acid Metabolism	Lipid	1629	2.13631	0.191299	0.302975
X-24400			999924400	1.59118	0.191781	0.303334
alpha-CEHC sulfate	Tocopherol Metabolism	Cofactors and Vitamins	100005972	0.778101	0.192021	0.303312
4-acetylcatechol sulfate (2)	Food Component/Plant	Xenobiotics	100020854	0.538181	0.193331	0.304976
X-23653			999923653	0.67341	0.194136	0.305841
2-piperidinone	Food Component/Plant	Xenobiotics	100004295	2.05286	0.1957	0.307897
X-25422			999925422	1.29204	0.195807	0.307659
X-23662			999923662	3.35674	0.19647	0.308295
trimethylamine N-oxide	Phospholipid Metabolism	Lipid	100003397	1.6849	0.197878	0.310096
taurocholenate sulfate*	Secondary Bile Acid Metabolism	Lipid	100001990	3.05908	0.19791	0.309738
3-amino-2-piperidone	Urea cycle; Arginine and Proline Metabolism	Amino Acid	100020361	0.831078	0.199078	0.311157
dimethylguanidino valeric acid (DMGV)*	Urea cycle; Arginine and Proline Metabolism	Amino Acid	100020866	0.48884	0.200583	0.313098
X-24135			999924135	0.0606175	0.201486	0.314096
glucuronide of C12H20O3 (4)*	Partially Characterized Molecules	Partially Characterized Molecules	100020094	2.2064	0.202924	0.315925
N-acetylleucine	Leucine, Isoleucine and Valine Metabolism	Amino Acid	1082	0.700112	0.205473	0.319475
X-23668			999923668	1.60755	0.205559	0.319193
X-24541			999924541	2.16676	0.206775	0.320664
laurylcarnitine (C12)	Fatty Acid Metabolism (Acyl Carnitine, Medium Chain)	Lipid	100001392	7.7252	0.207138	0.320808
5-dodecenoylcarnitine (C12:1)	Fatty Acid Metabolism (Acyl Carnitine, Monounsaturated)	Lipid	100016069	5.65251	0.208428	0.322386
X-17761			999917761	1.57012	0.211554	0.326797
N1-methylguanosine	Purine Metabolism, Guanine containing	Nucleotide	100001122	1.25894	0.211816	0.326778
N-acetylglucosamine/N-acetylgalactosamine	Aminosugar Metabolism	Carbohydrate	100006435	1.36911	0.213029	0.328224
glycochenodeoxycholate 3-sulfate	Primary Bile Acid Metabolism	Lipid	100006641	4.12526	0.213361	0.328312
6'-sialyllactose	Disaccharides and Oligosaccharides	Carbohydrate	100003132	2.07542	0.215185	0.330691
3-hydroxyoctanoylcarnitine (2)	Fatty Acid Metabolism (Acyl Carnitine, Hydroxy)	Lipid	100021991	1.99072	0.217036	0.333106
urea	Urea cycle; Arginine and Proline Metabolism	Amino Acid	533	0.839413	0.218942	0.335598
cysteinylglycine	Glutathione Metabolism	Amino Acid	278	1.35658	0.220428	0.337442
cholesterol	Sterol	Lipid	266	1.87977	0.221026	0.337924
phenol sulfate	Tyrosine Metabolism	Amino Acid	100001510	3.95129	0.221153	0.337683
X-12125			999912125	0.792879	0.221222	0.337356
X-21807			999921807	0.56208	0.225652	0.343673
theophylline	Xanthine Metabolism	Xenobiotics	100000437	2.67399	0.225752	0.343385
tauroursodeoxycholic acid sulfate (1)	Secondary Bile Acid Metabolism	Lipid	100020844	2.46605	0.228657	0.347361
5alpha-pregnan-diol disulfate	Progestin Steroids	Lipid	100002015	0.480764	0.22887	0.34724
2'-fucosyllactose	Disaccharides and Oligosaccharides	Carbohydrate	100002930	2.45662	0.22994	0.348421
3alpha,21-dihydroxy-5beta-pregnane-11,20-dione 21-glucuronide	Corticosteroids	Lipid	100005417	2.13925	0.234373	0.354687
1,6-anhydroglucose	Food Component/Plant	Xenobiotics	100000939	1.71107	0.235707	0.356253
gamma-glutamylglutamine	Gamma-glutamyl Amino Acid	Peptide	1140	2.38447	0.23703	0.357798
bilirubin degradation product, C16H18N2O5 (3)**	Partially Characterized Molecules	Partially Characterized Molecules	100022014	1.97102	0.23762	0.358234
glycocholenate sulfate*	Secondary Bile Acid Metabolism	Lipid	100001989	8.5012	0.237674	0.357862
nicotinamide	Nicotinate and Nicotinamide Metabolism	Cofactors and Vitamins	432	0.768049	0.238245	0.35827
picolinoylglycine	Fatty Acid Metabolism (Acyl Glycine)	Lipid	100021198	1.16063	0.239904	0.36031
histamine	Histidine Metabolism	Amino Acid	354	3.88736	0.239943	0.359914
glucuronide of C10H18O2 (1)*	Partially Characterized Molecules	Partially Characterized Molecules	100019990	2.31829	0.241008	0.361058
X-17348			999917348	3.33829	0.242572	0.362944
amoxicillin	Drug - Antibiotic	Xenobiotics	100008962	1.04171	0.242576	0.362494
pentose acid*	Partially Characterized Molecules	Partially Characterized Molecules	100021467	11.2922	0.244688	0.365192
X-11381			999911381	0.683532	0.246202	0.366992
X-24431			999924431	1.43355	0.24654	0.367036
serine	Glycine, Serine and Threonine Metabolism	Amino Acid	503	1.28613	0.250962	0.373154
N2-acetyl,N6-methyllysine	Lysine Metabolism	Amino Acid	100020546	1.31877	0.251953	0.37416
pregnenetriol disulfate*	Pregnenolone Steroids	Lipid	100021104	1.29188	0.252034	0.373813
gamma-tocopherol/beta-tocopherol	Tocopherol Metabolism	Cofactors and Vitamins	100008998	4.43857	0.252595	0.374179
uric acid ribonucleoside*	Purine Metabolism, (Hypo)Xanthine/Inosine containing	Nucleotide	100002682	1.74943	0.256172	0.379008
X-25271			999925271	2.4994	0.256561	0.379112
X-12812			999912812	1.79919	0.256608	0.378711
X-25542			999925542	5.79856	0.257415	0.379432
theanine	Food Component/Plant	Xenobiotics	100000784	1.36712	0.2607	0.3838
X-23459			999923459	0.68551	0.261935	0.385142
cytidine	Pyrimidine Metabolism, Cytidine containing	Nucleotide	827	1.52581	0.265281	0.389581
2-hydroxyarachidate*	Fatty Acid, Monohydroxy	Lipid	100019892	1.63259	0.268012	0.393106
sphinganine	Sphingolipid Synthesis	Lipid	313	1.70543	0.270429	0.396163
tryptamine	Tryptophan Metabolism	Amino Acid	1095	1.36636	0.273081	0.399557
glycolithocholate sulfate*	Secondary Bile Acid Metabolism	Lipid	100001657	3.85181	0.273548	0.399749
X-17685			999917685	1.22403	0.278357	0.406279
cystathionine	Methionine, Cysteine, SAM and Taurine Metabolism	Amino Acid	310	0.755659	0.278933	0.406621
1-ribosyl-imidazoleacetate*	Histidine Metabolism	Amino Acid	100001668	0.782765	0.279836	0.407438
3-hydroxybenzoate	Benzoate Metabolism	Xenobiotics	100000013	1.28696	0.283933	0.412899
X-25247			999925247	1.50846	0.284605	0.413371
undecenoylcarnitine (C11:1)	Fatty Acid Metabolism (Acyl Carnitine, Monounsaturated)	Lipid	100021131	3.48358	0.286603	0.415767
cortisone 21-sulfate	Corticosteroids	Lipid	100001995	1.62338	0.287804	0.417001
X-23329			999923329	0.445029	0.288082	0.416897
homocarnosine	Histidine Metabolism	Amino Acid	41	1.23958	0.288658	0.417222
caffeine	Xanthine Metabolism	Xenobiotics	849	1.20943	0.289635	0.418127
X-24764			999924764	5.62822	0.292158	0.42126
X-24133			999924133	0.103759	0.29388	0.423229
butenoylcarnitine (C4:1)	Fatty Acid Metabolism (Acyl Carnitine, Monounsaturated)	Lipid	100016058	1.28127	0.294167	0.423132
X-18059			999918059	1.33519	0.296352	0.425761
phenylalanine	Phenylalanine Metabolism	Amino Acid	460	1.22547	0.296608	0.425614
rocuronium	Drug - Neurological	Xenobiotics	100006745	0.453693	0.299083	0.42865
X-23436			999923436	3.03996	0.300623	0.430339
tetrahydrocortisone glucuronide (5)	Corticosteroids	Lipid	100022127	1.45426	0.305468	0.436749
5alpha-pregnan-3beta,20alpha-diol disulfate	Progestin Steroids	Lipid	100001988	1.29166	0.306399	0.437556
glucuronide of C8H14O2 (3)*	Partially Characterized Molecules	Partially Characterized Molecules	100020029	0.678628	0.306462	0.437121
1-stearoyl-GPE (18:0)	Lysophospholipid	Lipid	100001461	4.27742	0.308354	0.439294
thioproline	Chemical	Xenobiotics	100009232	0.65819	0.309042	0.439748
X-23787			999923787	0.774083	0.309682	0.440133
X-12100			999912100	0.762832	0.309801	0.439777
6-oxopiperidine-2-carboxylate	Lysine Metabolism	Amino Acid	100004499	1.18588	0.310548	0.440313
leucylglycine	Dipeptide	Peptide	100003185	1.39954	0.31135	0.440926
cortisone	Corticosteroids	Lipid	273	0.803103	0.313326	0.443197
X-12722			999912722	1.4598	0.315296	0.445454
trigonelline (N'-methylnicotinate)	Nicotinate and Nicotinamide Metabolism	Cofactors and Vitamins	100001092	1.171	0.315408	0.445084
pyruvate	Glycolysis, Gluconeogenesis, and Pyruvate Metabolism	Carbohydrate	823	1.37785	0.317466	0.447458
glycerol	Glycerolipid Metabolism	Lipid	1254	1.43672	0.322279	0.453705
4-acetaminophen sulfate	Drug - Analgesics, Anesthetics	Xenobiotics	2049	0.992404	0.322778	0.453872
gabapentin	Drug - Neurological	Xenobiotics	100002806	0.924386	0.322778	0.453336
morphine	Drug - Analgesics, Anesthetics	Xenobiotics	100000911	1.21975	0.322778	0.451738
metronidazole	Drug - Antibiotic	Xenobiotics	100015878	0.144474	0.322778	0.451208
morphine-6-glucuronide	Drug - Analgesics, Anesthetics	Xenobiotics	100016053	1.4161	0.322778	0.452802
ampicillin	Drug - Antibiotic	Xenobiotics	100021747	0.297679	0.322778	0.45227
morphine-3-glucuronide	Drug - Analgesics, Anesthetics	Xenobiotics	100016052	1.44236	0.322778	0.450679
pseudoephedrine	Drug - Respiratory	Xenobiotics	100002738	0.989329	0.322778	0.450151
nicotine	Tobacco Metabolite	Xenobiotics	100002736	1.00347	0.322778	0.449625
glutamine conjugate of C10H16O2 (2)*	Partially Characterized Molecules	Partially Characterized Molecules	100021701	1.44798	0.323662	0.450329
proline	Urea cycle; Arginine and Proline Metabolism	Amino Acid	480	1.30844	0.325067	0.451756
X-24798			999924798	1.27389	0.325811	0.452263
taurohyodeoxycholic acid	Secondary Bile Acid Metabolism	Lipid	100003869	1.44621	0.328343	0.455246
propyl 4-hydroxybenzoate sulfate	Benzoate Metabolism	Xenobiotics	100006264	2.48489	0.329049	0.455695
N2-acetyl,N6,N6-dimethyllysine	Lysine Metabolism	Amino Acid	100020545	1.42448	0.33437	0.462526
X-24546			999924546	0.732734	0.334663	0.462395
palmitoyl dihydrosphingomyelin (d18:0/16:0)*	Dihydrosphingomyelins	Lipid	100008954	1.49998	0.337082	0.465197
2-hydroxyhippurate (salicylurate)	Benzoate Metabolism	Xenobiotics	1869	1.32419	0.338706	0.466896
glucuronate	Aminosugar Metabolism	Carbohydrate	100000257	1.17167	0.340699	0.469102
2-hydroxyadipate	Fatty Acid, Dicarboxylate	Lipid	100001153	1.19184	0.340733	0.468606
retinol (Vitamin A)	Vitamin A Metabolism	Cofactors and Vitamins	498	1.43814	0.340954	0.468369
N-acetyltaurine	Methionine, Cysteine, SAM and Taurine Metabolism	Amino Acid	100005466	1.19174	0.348835	0.478644
X-24357			999924357	0.492304	0.349886	0.479532
argininate*	Urea cycle; Arginine and Proline Metabolism	Amino Acid	100002769	1.14324	0.350439	0.479739
trizma acetate	Chemical	Xenobiotics	100000856	0.128459	0.350839	0.479736
quinate	Food Component/Plant	Xenobiotics	100000442	1.38514	0.351175	0.479644
thiamin (Vitamin B1)	Thiamine Metabolism	Cofactors and Vitamins	873	0.843546	0.352667	0.48113
hippurate	Benzoate Metabolism	Xenobiotics	100000014	1.37239	0.353318	0.481467
isoxanthopterin	Pterin Metabolism	Cofactors and Vitamins	100000749	0.85118	0.35584	0.48435
bilirubin degradation product, C16H18N2O5 (1)**	Partially Characterized Molecules	Partially Characterized Molecules	100022003	1.80539	0.356668	0.484922
bilirubin degradation product, C16H18N2O5 (2)**	Partially Characterized Molecules	Partially Characterized Molecules	100022004	2.69979	0.357115	0.484977
N1-methylinosine	Purine Metabolism, (Hypo)Xanthine/Inosine containing	Nucleotide	100001409	1.17699	0.360675	0.489253
glucuronide of C8H18O2 (2)*	Partially Characterized Molecules	Partially Characterized Molecules	100020027	0.68488	0.361252	0.489479
3-indoleglyoxylic acid	Food Component/Plant	Xenobiotics	100020372	0.164747	0.362705	0.490889
dihydroferulic acid sulfate	Food Component/Plant	Xenobiotics	100020272	0.680379	0.363298	0.491132
X-24342			999924342	1.31437	0.363315	0.490599
N-carbamoylaspartate	Pyrimidine Metabolism, Orotate containing	Nucleotide	1108	1.38879	0.365186	0.492567
andro steroid monosulfate C19H28O6S (1)*	Androgenic Steroids	Lipid	100002152	1.317	0.367485	0.495106
2-methylcitrate	TCA Cycle	Energy	90	1.18043	0.370038	0.497984
X-24571			999924571	8.31214	0.37047	0.498002
taurolithocholate 3-sulfate	Secondary Bile Acid Metabolism	Lipid	100001658	1.99352	0.370547	0.497544
glyco-beta-muricholate**	Primary Bile Acid Metabolism	Lipid	100020214	4.41667	0.371088	0.497709
X-14056			999914056	0.557781	0.372372	0.498869
5-methyluridine (ribothymidine)	Pyrimidine Metabolism, Uracil containing	Nucleotide	100001446	1.52379	0.373693	0.500077
4-hydroxyphenylpyruvate	Tyrosine Metabolism	Amino Acid	1141	0.376668	0.377131	0.504111
glucuronide of C8H18O2 (1)*	Partially Characterized Molecules	Partially Characterized Molecules	100019993	1.62891	0.377288	0.503756
glucuronide of C9H10O4 (1)*	Partially Characterized Molecules	Partially Characterized Molecules	100020001	0.79564	0.378253	0.504479
glucose	Glycolysis, Gluconeogenesis, and Pyruvate Metabolism	Carbohydrate	572	1.39068	0.380183	0.506486
1-palmitoyl-GPE (16:0)	Lysophospholipid	Lipid	100001567	4.04623	0.380441	0.506263
3-hydroxyisobutyrate	Leucine, Isoleucine and Valine Metabolism	Amino Acid	111	1.28259	0.384217	0.510717
X-12193			999912193	1.32628	0.386039	0.512567
oxindolylalanine	Tryptophan Metabolism	Amino Acid	100022120	0.74845	0.388048	0.51466
X-24812			999924812	1.27604	0.388948	0.51528
lactodifucotetraose	Disaccharides and Oligosaccharides	Carbohydrate	100005443	1.58663	0.392852	0.519874
phenylacetylvaline	Acetylated Peptides	Peptide	100020880	0.793658	0.394074	0.520913
4-ureidobutyrate	Pyrimidine Metabolism, Uracil containing	Nucleotide	100000718	0.876198	0.394422	0.520794
X-24495			999924495	1.69128	0.394468	0.520279
N4-acetylcytidine	Pyrimidine Metabolism, Cytidine containing	Nucleotide	100001413	1.18075	0.396365	0.522202
N-monomethylarginine	Urea cycle; Arginine and Proline Metabolism	Amino Acid	100004488	1.18145	0.397054	0.522532
arginine	Urea cycle; Arginine and Proline Metabolism	Amino Acid	231	0.845279	0.397385	0.522391
3-methylglutaconate	Leucine, Isoleucine and Valine Metabolism	Amino Acid	100002458	1.12531	0.397644	0.522154
X-25806			999925806	1.26014	0.399272	0.523715
3-hydroxy-2-ethylpropionate	Leucine, Isoleucine and Valine Metabolism	Amino Acid	100001170	1.26005	0.403292	0.528406
deoxycarnitine	Carnitine Metabolism	Lipid	100001662	0.75798	0.407416	0.533223
isocaproylglycine	Fatty Acid Metabolism (Acyl Glycine)	Lipid	100019816	1.2175	0.416677	0.544744
pregnenediol sulfate (C21H34O5S)*	Pregnenolone Steroids	Lipid	100002067	0.561025	0.418033	0.545919
3,4-dihydroxyphenylacetate sulfate	Tyrosine Metabolism	Amino Acid	100006254	1.30024	0.420636	0.548715
X-13743			999913743	0.633192	0.424942	0.553726
2-pentenoylglycine	Fatty Acid Metabolism (Acyl Glycine)	Lipid	100021143	0.78244	0.425075	0.553294
dopamine 3-O-sulfate	Tyrosine Metabolism	Amino Acid	100006361	1.22087	0.425339	0.553034
2,3-dihydroxypyridine	Food Component/Plant	Xenobiotics	100000861	1.34853	0.427808	0.555638
X-24353			999924353	0.784938	0.428806	0.556327
3-methyl-2-oxobutyrate	Leucine, Isoleucine and Valine Metabolism	Amino Acid	100000936	1.38728	0.431705	0.559478
furosemide	Drug - Cardiovascular	Xenobiotics	100004241	1.52112	0.43216	0.55946
dihydrobiopterin	Tetrahydrobiopterin Metabolism	Cofactors and Vitamins	100001506	1.27802	0.432959	0.559885
bilirubin degradation product, C16H18N2O5 (4)**	Partially Characterized Molecules	Partially Characterized Molecules	100022015	1.51405	0.435228	0.562209
X-11444			999911444	1.88306	0.43772	0.564816
2-furoylcarnitine	Food Component/Plant	Xenobiotics	100016070	1.49387	0.444691	0.57319
azelate (C9-DC)	Fatty Acid, Dicarboxylate	Lipid	2029	1.32242	0.445806	0.574005
N-carbamoylvaline	Leucine, Isoleucine and Valine Metabolism	Amino Acid	100020351	1.11369	0.446412	0.574164
alpha-CEHC	Tocopherol Metabolism	Cofactors and Vitamins	100002206	1.56526	0.448258	0.575917
glucuronide of C10H18O2 (8)*	Partially Characterized Molecules	Partially Characterized Molecules	100020015	2.12466	0.449511	0.576904
X-26099			999926099	0.865279	0.44967	0.576487
2-dimethylaminoethanol	Food Component/Plant	Xenobiotics	100001630	0.579713	0.45579	0.583705
1,2,3-butanetriol	Food Component/Plant	Xenobiotics	100002193	1.22464	0.456668	0.584202
carnitine of C10H14O2 (1)*	Partially Characterized Molecules	Partially Characterized Molecules	100021674	0.734807	0.457017	0.584021
2-keto-3-deoxy-gluconate	Food Component/Plant	Xenobiotics	100005946	1.30861	0.457219	0.583653
glycoursodeoxycholic acid sulfate (1)	Secondary Bile Acid Metabolism	Lipid	100020819	1.40284	0.459405	0.585815
N-acetylglucosamine conjugate of C24H38O4 bile acid**	Partially Characterized Molecules	Partially Characterized Molecules	100020008	1.27916	0.463739	0.590709
lacto-N-fucopentaose I	Disaccharides and Oligosaccharides	Carbohydrate	100002938	1.99417	0.464417	0.590941
palmitoylcarnitine (C16)	Fatty Acid Metabolism (Acyl Carnitine, Long Chain Saturated)	Lipid	100000776	1.4865	0.464694	0.590662
X-25957			999925957	0.766903	0.465267	0.59076
gamma-glutamyltyrosine	Gamma-glutamyl Amino Acid	Peptide	1102	1.31468	0.465441	0.590352
glycerophosphorylcholine (GPC)	Phospholipid Metabolism	Lipid	100000269	0.807819	0.46677	0.591407
2-aminoheptanoate	Fatty Acid, Amino	Lipid	100004542	1.53466	0.470892	0.595996
X-22152			999922152	0.794525	0.472183	0.596996
2-hydroxyglutarate	Fatty Acid, Dicarboxylate	Lipid	100002070	1.17343	0.4726	0.596889
methyl-4-hydroxybenzoate sulfate	Benzoate Metabolism	Xenobiotics	100006116	1.18622	0.474323	0.59843
lysine	Lysine Metabolism	Amino Acid	407	1.15092	0.478469	0.603023
X-23650			999923650	0.655299	0.479275	0.6034
m-tyramine	Tyrosine Metabolism	Amino Acid	100002797	0.868719	0.481671	0.605776
4-acetylphenol sulfate	Benzoate Metabolism	Xenobiotics	100000711	0.856969	0.482277	0.605899
X-25656			999925656	0.677296	0.48506	0.608752
2'-deoxyguanosine	Purine Metabolism, Guanine containing	Nucleotide	348	0.588963	0.486909	0.61043
2-hydroxydecanoate	Fatty Acid, Monohydroxy	Lipid	100004089	1.23938	0.487021	0.609928
3-sulfo-L-alanine	Methionine, Cysteine, SAM and Taurine Metabolism	Amino Acid	382	0.735686	0.48813	0.610675
X-23868			999923868	0.811852	0.489435	0.611666
ferulate	Food Component/Plant	Xenobiotics	100001542	1.37349	0.49014	0.611904
X-26058			999926058	1.14098	0.491268	0.61267
X-21285			999921285	1.31562	0.491989	0.612928
saccharopine	Lysine Metabolism	Amino Acid	392	1.13808	0.494634	0.615578
pregnenolone sulfate	Pregnenolone Steroids	Lipid	100002129	0.647838	0.497134	0.618044
taurochenodeoxycholic acid 3-sulfate	Secondary Bile Acid Metabolism	Lipid	100021093	1.59803	0.498481	0.619073
X-25948			999925948	1.19188	0.501353	0.621991
tyrosine	Tyrosine Metabolism	Amino Acid	815	1.40492	0.501526	0.621558
syringol sulfate	Food Component/Plant	Xenobiotics	100006256	1.2433	0.502721	0.622392
threonine	Glycine, Serine and Threonine Metabolism	Amino Acid	564	1.23738	0.503394	0.622577
X-23502			999923502	0.867362	0.504966	0.623874
2-hydroxy-3-methylvalerate	Leucine, Isoleucine and Valine Metabolism	Amino Acid	100001541	1.4912	0.507876	0.626819
X-24518			999924518	1.17314	0.509707	0.628428
nicotinate ribonucleoside	Nicotinate and Nicotinamide Metabolism	Cofactors and Vitamins	100001316	1.69187	0.509987	0.628122
X-23482			999923482	1.29094	0.514412	0.632918
X-24414			999924414	2.44227	0.5174	0.635938
16a-hydroxy DHEA 3-sulfate	Androgenic Steroids	Lipid	100002126	1.26614	0.518552	0.636697
X-15503			999915503	0.890698	0.523757	0.642425
o-Tyrosine	Tyrosine Metabolism	Amino Acid	100004290	0.844422	0.525752	0.644209
X-12306			999912306	1.20335	0.528127	0.646453
umbelliferone sulfate	Food Component/Plant	Xenobiotics	100006282	1.96707	0.532379	0.650989
cystine	Methionine, Cysteine, SAM and Taurine Metabolism	Amino Acid	279	0.823071	0.533367	0.651529
glucuronide of C14H22O4 (1)*	Partially Characterized Molecules	Partially Characterized Molecules	100019998	1.17053	0.540214	0.659216
2-amino-2-methyl-1-propanol	Chemical	Xenobiotics	100000832	0.507852	0.541664	0.660309
dimethyl sulfone	Chemical	Xenobiotics	100004284	1.29908	0.545448	0.664242
3-hydroxyphenylacetate sulfate	Tyrosine Metabolism	Amino Acid	100006634	1.11839	0.546369	0.664684
pyridoxate	Vitamin B6 Metabolism	Cofactors and Vitamins	100001121	1.09434	0.546588	0.664272
phenylacetyl-beta-alanine	Acetylated Peptides	Peptide	100021322	0.755879	0.546664	0.663686
X-25810			999925810	0.803659	0.552587	0.670194
homoarginine	Urea cycle; Arginine and Proline Metabolism	Amino Acid	100000961	1.4208	0.554597	0.671948
X-21286			999921286	0.890659	0.556625	0.67372
cortisol	Corticosteroids	Lipid	356	0.643826	0.556781	0.673225
4-methylguaiacol sulfate	Benzoate Metabolism	Xenobiotics	100006105	0.776578	0.558893	0.675093
kynurenine	Tryptophan Metabolism	Amino Acid	100000265	1.2118	0.562664	0.678959
gamma-glutamylphenylalanine	Gamma-glutamyl Amino Acid	Peptide	100000491	0.901652	0.563157	0.678866
2'-deoxyinosine	Purine Metabolism, (Hypo)Xanthine/Inosine containing	Nucleotide	100000135	0.598064	0.565016	0.680419
glucuronide of C10H18O2 (9)*	Partially Characterized Molecules	Partially Characterized Molecules	100020016	1.48644	0.566336	0.681319
homovanillate sulfate	Tyrosine Metabolism	Amino Acid	100002250	0.862811	0.567359	0.681861
glutarylcarnitine (C5-DC)	Lysine Metabolism	Amino Acid	100001593	1.11297	0.567589	0.681451
X-24246			999924246	0.762914	0.568275	0.681586
N2-acetyllysine	Lysine Metabolism	Amino Acid	100001721	0.905609	0.571004	0.684171
3-formylindole	Food Component/Plant	Xenobiotics	100020219	1.30313	0.571221	0.683743
2,3-dihydroxy-5-methylthio-4-pentenoate (DMTPA)*	Methionine, Cysteine, SAM and Taurine Metabolism	Amino Acid	100020893	1.12008	0.575973	0.688739
X-25435			999925435	1.23265	0.576643	0.688849
ursocholate	Secondary Bile Acid Metabolism	Lipid	100002913	0.887203	0.579474	0.691536
(R)-3-hydroxybutyrylcarnitine	Fatty Acid Metabolism (Acyl Carnitine, Hydroxy)	Lipid	100003926	0.80835	0.580447	0.692005
X-25109			999925109	0.725712	0.582965	0.694311
X-24590			999924590	0.776533	0.586056	0.697296
hypotaurine	Methionine, Cysteine, SAM and Taurine Metabolism	Amino Acid	358	1.21985	0.587262	0.698032
X-24339			999924339	1.10311	0.591192	0.702004
tauro-beta-muricholate	Primary Bile Acid Metabolism	Lipid	100001250	1.63643	0.591342	0.701482
1,2-dipalmitoyl-GPC (16:0/16:0)	Phosphatidylcholine (PC)	Lipid	100000657	1.28359	0.5943	0.704289
7-hydroxyoctanoate	Fatty Acid, Monohydroxy	Lipid	100001223	0.810097	0.600215	0.710592
alpha-CEHC taurine*	Tocopherol Metabolism	Cofactors and Vitamins	100005975	1.32729	0.600421	0.710131
gamma-glutamylvaline	Gamma-glutamyl Amino Acid	Peptide	100001126	1.07527	0.600995	0.710105
X-12112			999912112	0.888067	0.601253	0.709705
dihydroorotate	Pyrimidine Metabolism, Orotate containing	Nucleotide	923	1.30122	0.608278	0.717287
1-methylhistamine	Histidine Metabolism	Amino Acid	100001204	1.11535	0.609502	0.718019
citrulline	Urea cycle; Arginine and Proline Metabolism	Amino Acid	391	1.14846	0.61118	0.719284
gamma-glutamylleucine	Gamma-glutamyl Amino Acid	Peptide	1268	0.910779	0.618272	0.726912
benzoylcarnitine*	Chemical	Xenobiotics	100004555	1.23767	0.619373	0.727489
3-methylcrotonylglycine	Leucine, Isoleucine and Valine Metabolism	Amino Acid	100001149	0.877321	0.625052	0.733435
spermidine	Polyamine Metabolism	Amino Acid	50	1.39166	0.627099	0.735113
X-18779			999918779	0.785533	0.628598	0.736145
S-carboxymethyl-L-cysteine	Drug - Other	Xenobiotics	100002324	0.876892	0.630843	0.738049
X-12410			999912410	0.827198	0.631042	0.737557
X-24515			999924515	0.884319	0.631971	0.737919
putrescine	Polyamine Metabolism	Amino Acid	49	1.32183	0.63323	0.738665
3-hydroxydecanoylcarnitine	Fatty Acid Metabolism (Acyl Carnitine, Hydroxy)	Lipid	100021141	0.855047	0.633288	0.73801
X-23157			999923157	0.862797	0.634833	0.739087
guanosine	Purine Metabolism, Guanine containing	Nucleotide	1099	1.30626	0.637027	0.740917
glucuronide of C14H22O4 (3)*	Partially Characterized Molecules	Partially Characterized Molecules	100020097	0.730149	0.641642	0.745556
X-16124			999916124	0.878382	0.641954	0.745192
phenylacetylthreonine	Acetylated Peptides	Peptide	100010899	1.08164	0.643441	0.746191
ethyl beta-glucopyranoside	Food Component/Plant	Xenobiotics	100020377	0.789477	0.643982	0.746093
tetrahydrocortisol glucuronide	Corticosteroids	Lipid	100022013	0.693134	0.645712	0.74737
cysteinylglycine disulfide*	Glutathione Metabolism	Amino Acid	100002466	0.901473	0.64673	0.74782
X-21815			999921815	1.35932	0.650308	0.751229
N-acetyl-1-methylhistidine*	Histidine Metabolism	Amino Acid	100004299	0.918823	0.660874	0.762694
X-23908			999923908	0.824413	0.661495	0.762672
cholesterol sulfate	Sterol	Lipid	100001606	0.794248	0.661814	0.762302
glucuronide of C8H14O2 (6)*	Partially Characterized Molecules	Partially Characterized Molecules	100020032	1.14859	0.664886	0.765101
ceramide (d18:2/24:1, d18:1/24:2)*	Ceramides	Lipid	100015744	0.630478	0.667149	0.766964
glycine conjugate of C6H10O2 (2)*	Partially Characterized Molecules	Partially Characterized Molecules	100021680	1.1082	0.669532	0.768961
hexanoylcarnitine (C6)	Fatty Acid Metabolism (Acyl Carnitine, Medium Chain)	Lipid	100000781	1.18018	0.670001	0.768759
adenosine	Purine Metabolism, Adenine containing	Nucleotide	798	0.727159	0.671468	0.769701
gamma-glutamylglycine	Gamma-glutamyl Amino Acid	Peptide	100001294	0.915449	0.671765	0.7693
triethanolamine	Chemical	Xenobiotics	100000989	1.55333	0.674159	0.7713
gamma-glutamylthreonine	Gamma-glutamyl Amino Acid	Peptide	100001314	1.09064	0.677773	0.774691
methyl-4-hydroxybenzoate	Benzoate Metabolism	Xenobiotics	100001252	0.636647	0.679159	0.77553
dehydroepiandrosterone glucuronide	Androgenic Steroids	Lipid	100005405	1.34888	0.680076	0.775833
phenylacetylmethionine	Acetylated Peptides	Peptide	100009241	0.858982	0.681824	0.777084
cadaverine	Lysine Metabolism	Amino Acid	100000110	1.68149	0.687848	0.7832
X-24338			999924338	1.07859	0.692413	0.787645
gamma-glutamylhistidine	Gamma-glutamyl Amino Acid	Peptide	1235	1.069	0.708088	0.804707
tiglylcarnitine (C5:1-DC)	Leucine, Isoleucine and Valine Metabolism	Amino Acid	100001597	0.92177	0.709108	0.805098
4-acetylcatechol sulfate (1)	Food Component/Plant	Xenobiotics	100020853	1.1289	0.709532	0.804812
norfentanyl	Drug - Analgesics, Anesthetics	Xenobiotics	100021109	0.889642	0.715276	0.810555
beta-hydroxyisovaleroylcarnitine	Leucine, Isoleucine and Valine Metabolism	Amino Acid	100001594	1.08111	0.716822	0.811535
X-23481			999923481	0.912422	0.716905	0.810858
2-methoxyhydroquinone sulfate (2)	Benzoate Metabolism	Xenobiotics	100021840	1.13499	0.717548	0.810816
ranitidine N-oxide*	Drug - Gastrointestinal	Xenobiotics	100020810	1.34861	0.717714	0.810235
X-25450			999925450	0.693435	0.718373	0.81021
methyl vanillate sulfate	Food Component/Plant	Xenobiotics	100020622	1.1626	0.7216	0.81308
ceramide (d18:1/20:0, d16:1/22:0, d20:1/18:0)*	Ceramides	Lipid	100015755	0.670262	0.721985	0.812745
X-24273			999924273	0.881054	0.727079	0.817706
diaminopimelate	Bacterial/Fungal	Xenobiotics	100000115	0.899675	0.728641	0.81869
monoethyl phthalate O-beta-D-glucuronide	Chemical	Xenobiotics	100021975	0.736591	0.728857	0.818161
glucuronide of C8H14O2 (4)*	Partially Characterized Molecules	Partially Characterized Molecules	100020030	1.09075	0.730011	0.818685
X-23654			999923654	0.932102	0.731393	0.819463
citramalate	Glutamate Metabolism	Amino Acid	100000998	1.10354	0.731837	0.819189
3,4-dihydroxyphenylacetate	Tyrosine Metabolism	Amino Acid	100000449	0.903864	0.739563	0.827061
ceramide (d18:1/17:0, d17:1/18:0)*	Ceramides	Lipid	100015737	1.12751	0.739814	0.826566
acetylhydroquinone sulfate	Chemical	Xenobiotics	100020581	1.09594	0.741926	0.828148
S-carboxyethylcysteine	Methionine, Cysteine, SAM and Taurine Metabolism	Amino Acid	100021530	1.05392	0.748405	0.834598
17alpha-hydroxypregnenolone 3-sulfate	Pregnenolone Steroids	Lipid	100002128	0.831233	0.748885	0.834352
valylleucine	Dipeptide	Peptide	100003210	1.10566	0.767185	0.853941
glucuronide of C10H18O2 (7)*	Partially Characterized Molecules	Partially Characterized Molecules	100020014	1.30372	0.77183	0.85831
N-palmitoyl-sphinganine (d18:0/16:0)	Dihydroceramides	Lipid	100009028	0.756685	0.772174	0.857892
carnitine of C10H14O2 (4)*	Partially Characterized Molecules	Partially Characterized Molecules	100021677	1.14922	0.772487	0.857439
4-guanidinobutanoate	Guanidino and Acetamido Metabolism	Amino Acid	100000096	0.953001	0.773314	0.857558
dopamine	Tyrosine Metabolism	Amino Acid	1748	1.11652	0.77422	0.857764
4-methoxyphenol sulfate	Tyrosine Metabolism	Amino Acid	100006262	0.929756	0.779695	0.863027
5-methylthioadenosine (MTA)	Polyamine Metabolism	Amino Acid	212	0.926329	0.783051	0.865937
X-21816			999921816	1.14202	0.783187	0.865284
bilirubin (Z,Z)	Hemoglobin and Porphyrin Metabolism	Cofactors and Vitamins	1090	1.33276	0.787525	0.86927
kynurenate	Tryptophan Metabolism	Amino Acid	98	0.965134	0.792176	0.873594
isobutyrylglycine	Leucine, Isoleucine and Valine Metabolism	Amino Acid	100001590	0.925795	0.793936	0.874725
glycerophosphoserine*	Phospholipid Metabolism	Lipid	100015666	1.05087	0.794391	0.874417
tartarate	Food Component/Plant	Xenobiotics	100000295	1.08714	0.795869	0.875236
fluconazole	Drug - Antibiotic	Xenobiotics	100015972	0.80922	0.797381	0.87609
X-24801			999924801	0.945943	0.800429	0.878627
phenylpyruvate	Phenylalanine Metabolism	Amino Acid	241	0.872887	0.801469	0.878959
N-acetylmethionine	Methionine, Cysteine, SAM and Taurine Metabolism	Amino Acid	1083	0.922045	0.801907	0.87863
X-24489			999924489	0.874658	0.806609	0.88297
2-oxoadipate	Lysine Metabolism	Amino Acid	92	1.1266	0.807365	0.882986
GlcNAc sulfate conjugate of C21H34O2 steroid**	Partially Characterized Molecules	Partially Characterized Molecules	100021726	1.10674	0.807476	0.882297
allantoic acid	Purine Metabolism, (Hypo)Xanthine/Inosine containing	Nucleotide	218	1.0846	0.808063	0.88213
X-17707			999917707	1.14575	0.809773	0.883186
3-(4-hydroxyphenyl)lactate	Tyrosine Metabolism	Amino Acid	240	0.877734	0.809844	0.882456
4-hydroxymandelate	Benzoate Metabolism	Xenobiotics	1115	1.17743	0.811378	0.883319
gamma-CEHC	Tocopherol Metabolism	Cofactors and Vitamins	100002094	0.902579	0.81156	0.882711
3-phosphoglycerate	Glycolysis, Gluconeogenesis, and Pyruvate Metabolism	Carbohydrate	132	1.13826	0.812182	0.882581
indoleacetoylcarnitine*	Tryptophan Metabolism	Amino Acid	100020479	0.903292	0.814389	0.884172
N-formylkynurenine	Tryptophan Metabolism	Amino Acid	186	1.08929	0.814693	0.883697
methionine sulfoxide	Methionine, Cysteine, SAM and Taurine Metabolism	Amino Acid	100000039	1.06265	0.819878	0.888511
17alpha-hydroxypregnanolone glucuronide	Pregnenolone Steroids	Lipid	100005418	0.929839	0.821411	0.889364
3-(3-hydroxyphenyl)propionate	Benzoate Metabolism	Xenobiotics	100001624	0.952464	0.825266	0.892727
X-19141			999919141	1.08272	0.82656	0.893315
2-methylbutyrylglycine	Leucine, Isoleucine and Valine Metabolism	Amino Acid	100001155	0.926533	0.832478	0.898895
X-22158			999922158	1.05248	0.833672	0.899369
7-hydroxyindole sulfate	Tryptophan Metabolism	Amino Acid	100009043	0.949902	0.840096	0.90548
cysteine s-sulfate	Methionine, Cysteine, SAM and Taurine Metabolism	Amino Acid	100000808	0.954973	0.841408	0.906074
(S)-3-hydroxybutyrylcarnitine	Fatty Acid Metabolism (Acyl Carnitine, Hydroxy)	Lipid	100009271	1.06195	0.844935	0.90905
N-acetyl-3-methylhistidine*	Histidine Metabolism	Amino Acid	100002204	1.04024	0.845572	0.908914
gamma-glutamyl-epsilon-lysine	Gamma-glutamyl Amino Acid	Peptide	100001262	1.05279	0.84632	0.908897
tetrahydrocortisol sulfate (1)	Corticosteroids	Lipid	100020848	1.0438	0.849303	0.911279
dibutyl sulfosuccinate	Chemical	Xenobiotics	100021538	0.947211	0.851436	0.912745
3-hydroxyhexanoylcarnitine (2)	Fatty Acid Metabolism (Acyl Carnitine, Hydroxy)	Lipid	100020826	0.944802	0.853667	0.914315
X-24457			999924457	0.856703	0.856267	0.916275
X-24327			999924327	1.08401	0.861428	0.92097
X-23518			999923518	0.966958	0.86162	0.920349
vanillic alcohol sulfate	Tyrosine Metabolism	Amino Acid	100006125	1.08398	0.865099	0.923237
indolelactate	Tryptophan Metabolism	Amino Acid	100000463	0.922753	0.867294	0.924751
sulfate*	Chemical	Xenobiotics	100002528	0.974867	0.868984	0.925724
ascorbate (Vitamin C)	Ascorbate and Aldarate Metabolism	Cofactors and Vitamins	233	1.14997	0.869699	0.925658
ceramide (d18:1/14:0, d16:1/16:0)*	Ceramides	Lipid	100015735	0.857432	0.876225	0.931772
dopamine 4-sulfate	Tyrosine Metabolism	Amino Acid	100006360	1.05354	0.87708	0.931849
dehydroepiandrosterone sulfate (DHEA-S)	Androgenic Steroids	Lipid	100000792	1.05707	0.877819	0.931802
X-23666			999923666	1.0273	0.879417	0.932667
N-acetylisoleucine	Leucine, Isoleucine and Valine Metabolism	Amino Acid	100001276	0.972737	0.881098	0.933619
beta-hydroxyisovalerate	Leucine, Isoleucine and Valine Metabolism	Amino Acid	1442	0.956981	0.881305	0.933008
N-acetylmethionine sulfoxide	Methionine, Cysteine, SAM and Taurine Metabolism	Amino Acid	100005463	0.961994	0.882522	0.933467
N-formylmethionine	Methionine, Cysteine, SAM and Taurine Metabolism	Amino Acid	194	1.05254	0.893991	0.944759
X-12721			999912721	0.981473	0.89476	0.944733
X-24586			999924586	1.03579	0.899176	0.948555
delta-CEHC	Tocopherol Metabolism	Cofactors and Vitamins	100020416	0.952495	0.899578	0.948139
8-methoxykynurenate	Tryptophan Metabolism	Amino Acid	100020360	0.982298	0.908766	0.956977
X-24796			999924796	1.02761	0.909819	0.957239
vancomycin	Drug - Antibiotic	Xenobiotics	100002992	0.972651	0.917741	0.964722
N-palmitoyl-sphingosine (d18:1/16:0)	Ceramides	Lipid	1518	1.08726	0.918904	0.965092
methionine	Methionine, Cysteine, SAM and Taurine Metabolism	Amino Acid	415	0.961334	0.922329	0.967836
octanoylcarnitine (C8)	Fatty Acid Metabolism (Acyl Carnitine, Medium Chain)	Lipid	100001247	0.963926	0.922946	0.967631
diethylamine	Chemical	Xenobiotics	100004379	1.02623	0.923009	0.966846
pyridoxal	Vitamin B6 Metabolism	Cofactors and Vitamins	491	0.978325	0.925095	0.96818
X-17763			999917763	1.05592	0.925725	0.967988
levulinoylcarnitine	Food Component/Plant	Xenobiotics	100021140	1.02797	0.927189	0.968669
histidine	Histidine Metabolism	Amino Acid	355	1.01878	0.927509	0.968153
phenylacetylserine	Acetylated Peptides	Peptide	100010900	0.984217	0.9297	0.96959
gamma-glutamyl-alpha-lysine	Gamma-glutamyl Amino Acid	Peptide	100010901	1.02421	0.931307	0.970417
cortolone glucuronide (1)	Corticosteroids	Lipid	100015971	0.967582	0.935775	0.97422
X-24544			999924544	0.968493	0.936179	0.97379
phenyllactate (PLA)	Phenylalanine Metabolism	Amino Acid	100000774	1.04128	0.936797	0.973583
glycerophosphoethanolamine	Phospholipid Metabolism	Lipid	100001620	1.01719	0.937649	0.973618
alanylleucine	Dipeptide	Peptide	100001890	0.988301	0.960487	0.996463
X-25932			999925932	0.989884	0.964288	0.999537
3-aminoisobutyrate	Pyrimidine Metabolism, Thymine containing	Nucleotide	1114	1.04132	0.966448	1
carnitine of C10H14O2 (2)*	Partially Characterized Molecules	Partially Characterized Molecules	100021675	1.01351	0.977795	1
tigloylglycine	Leucine, Isoleucine and Valine Metabolism	Amino Acid	1161	1.00483	0.986612	1
dehydroascorbate	Ascorbate and Aldarate Metabolism	Cofactors and Vitamins	301	0.996937	0.990326	1
ranitidine	Drug - Gastrointestinal	Xenobiotics	100002735	0.990276	0.990604	1
sphingosine	Sphingosines	Lipid	297	1.00329	0.995899	1
1H-indole-7-acetic acid	Bacterial/Fungal	Xenobiotics	100004601	1.00071	0.996271	1
phenylacetyltaurine	Acetylated Peptides	Peptide	100008932	0.998987	0.996784	1
4-acetamidophenol	Drug - Analgesics, Anesthetics	Xenobiotics	1383	1	1	1
3-(N-acetyl-L-cystein-S-yl) acetaminophen	Drug - Analgesics, Anesthetics	Xenobiotics	2048	1	1	1
lidocaine	Drug - Analgesics, Anesthetics	Xenobiotics	100001538	1	1	1
2-hydroxyacetaminophen sulfate*	Drug - Analgesics, Anesthetics	Xenobiotics	100001791	1	1	1
2-methoxyacetaminophen sulfate*	Drug - Analgesics, Anesthetics	Xenobiotics	100001793	1	1	1
3-(cystein-S-yl)acetaminophen*	Drug - Analgesics, Anesthetics	Xenobiotics	100001797	1	1	1
atropine	Drug - Neurological	Xenobiotics	100002369	1	1	1
metformin	Drug - Metabolic	Xenobiotics	100002405	1	1	1
ibuprofen acyl glucuronide	Drug - Analgesics, Anesthetics	Xenobiotics	100002406	1	1	1
6-aminopenicillanate	Drug - Antibiotic	Xenobiotics	100002627	1	1	1
2-hydroxyibuprofen	Drug - Analgesics, Anesthetics	Xenobiotics	100004169	1	1	1
carboxyibuprofen	Drug - Analgesics, Anesthetics	Xenobiotics	100004171	1	1	1
clotrimazole	Drug - Antibiotic	Xenobiotics	100004179	1	1	1
cyclo(pro-tyr)	Dipeptide	Peptide	100004363	1	1	1
ceftazidime	Drug - Antibiotic	Xenobiotics	100015887	1	1	1
cefazolin	Drug - Antibiotic	Xenobiotics	100015895	1	1	1
N4-acetylsulfamethoxazole*	Drug - Antibiotic	Xenobiotics	100020243	1	1	1
N4-acetyl-5-hydroxysulfamethoxazole*	Drug - Antibiotic	Xenobiotics	100020244	1	1	1
3-(methylthio)acetaminophen sulfate*	Drug - Analgesics, Anesthetics	Xenobiotics	100020827	1	1	1
methadone	Drug - Analgesics, Anesthetics	Xenobiotics	100021084	1	1	1
4-acetamidophenylglucuronide	Drug - Analgesics, Anesthetics	Xenobiotics	100000043	1
metoprolol acid metabolite*	Drug - Cardiovascular	Xenobiotics	100001385	1
N-ethylglycinexylidide	Drug - Analgesics, Anesthetics	Xenobiotics	100001539	1
desmethylnaproxen sulfate	Drug - Analgesics, Anesthetics	Xenobiotics	100001788	1
2-methoxyacetaminophen glucuronide*	Drug - Analgesics, Anesthetics	Xenobiotics	100001795	1
asmol	Drug - Respiratory	Xenobiotics	100003966	1
vecuronium	Drug - Neurological	Xenobiotics	100004027	1
meglumine	Chemical	Xenobiotics	100004440	1
sulfamethoxazole	Drug - Antibiotic	Xenobiotics	100009327	1
lamotrigine	Drug - Neurological	Xenobiotics	100009390	1
metoclopramide	Drug - Gastrointestinal	Xenobiotics	100015782	1
meropenem	Drug - Antibiotic	Xenobiotics	100015875	1
trimethoprim	Drug - Antibiotic	Xenobiotics	100020868	1
bumetanide	Drug - Cardiovascular	Xenobiotics	100021793	1
* Indicates a compound that has not been confirmed based on a standard, but Metabolon is confident in its identity.
